# Supplementary material for: Regioselective Rh-catalyzed direct carbonylation of indoles to synthesize indole-3-carboxylates
Source: Royal Society of Chemistry journal article supplement (doi:10.1039/c1cc15143f), 2011-01-01

## **Regioselectively Rh-catalyzed direct carbonylation of indole to synthesize indole-3-carboxylate**

Rui Lang,<sup>a</sup> Junliang Wu,<sup>a</sup> Lijun Shi,<sup>a</sup> Chungu Xia<sup>\*a</sup> and Fuwei Li<sup>\*a,b</sup>

<sup>a</sup> State Key Laboratory for Oxo Synthesis and Selective Oxidation, Lanzhou Institute of Chemical Physics, Chinese Academy of Sciences, Lanzhou, 73000, China. Fax: (+86)-931-4968129. Email: [fuweili@licp.cas.cn](mailto:fuweili@licp.cas.cn)

<sup>b</sup> Suzhou Institute of Nano-Tech and Nano-Bionics, Chinese Academy of Sciences, Suzhou, 215123, China.

### **Contents**

- 1. General information**
- 2. General procedures for the synthesis of *N*-substituted indoles**
- 3. Experimental procedure for Rh-catalyzed direct carbonylation**
- 4. Experiments on investigation of mechanism**
- 5. Characterization data for products**
- 6. <sup>1</sup>H NMR and <sup>13</sup>C NMR copies of products**
- 7. Heteronuclear multiple bond coherence spectrum of product 3a**

### **1. General information**

All the chemicals and solvents were used as received without further purification. Silica gel was purchased from Qing Dao Hai Lang Chemical Industry Co. NMR spectra of the products were recorded using a Bruker Avance TM spectrometer operating at 400 MHz for <sup>1</sup>H and 100 MHz for <sup>13</sup>C in CDCl<sub>3</sub> unless otherwise noted. High resolution mass spectra (HRMS) of the products were obtained on a Bruker Daltonics micrO TOF-Q spectrometer. High-performance liquid chromatography (HPLC) analysis was performed by Agilent 1260 Infinity equipped with an Agilent ZORBAX SB-C18 column using aqueous methanol as eluent and 2, 3-dimethylindole

as inner standard. X-ray Single Crystal Diffraction measurement was conducted at 296 K on a Bruker SMART APEX II diffractometer using Mo K $\alpha$  radiation ( $\gamma = 0.71073\text{\AA}$ ). The data were corrected for Lorentz and polarization effects with the SMART suite of programs and for absorption effects with SADABS. The structure was solved by direct methods using the SHELXS program.

## 2. General procedures for the synthesis of *N*-substituted indoles

### *General procedure for the preparation of N-methyl indoles*<sup>1</sup>

To a stirred solution of N-H indoles (1 mol) in ether (10 mL) was slowly added Potassium tert-butanolate (2 mol) and Iodomethane (2 mol) at 0 °C. after 24 h, the mixture was poured into saturated aqueous NaHCO<sub>3</sub> solution and extracted with ether three times. The combined organic layers were dried over Na<sub>2</sub>SO<sub>4</sub> and concentrated in vacuo. Purification by column chromatograph on silica gel.

### *General procedure for the preparation of N-allyl indoles*<sup>2</sup>

To a stirred solution of N-H indoles (1 mol) in DMF (10 mL) was slowly added Potassium hydroxide (1.2 mol) and Allyl bromide (1.2 mol). After 12 h at 50 °C, the reaction mixture was cooled to room temperature, poured into saturated aqueous NaHCO<sub>3</sub> solution and extracted with ether three times. The combined organic layers were dried over Na<sub>2</sub>SO<sub>4</sub> and concentrated in vacuo. Purification by column chromatograph on silica gel.

### *General procedure for the preparation of N-benzyl indoles*<sup>3</sup>

To a stirred solution of N-H indoles (1 mol) in Tetrahydrofuran (10 mL) was slowly added Potassium hydroxide (4 mol) and Benzyl bromide (1 mol) at 0 °C. after 24 h,

- 
1. Y. Naruse, Y. Ito and S. Inagaki, *J. Org. Chem.*, 1991, **56**, 2256-2258.
  2. F. Gagosz and S. Z. Zard, *Org. Lett.*, 2002, **4**, 4345-4348.
  3. H. Heaney, S. V. Ley, A. Brossi, E. E. Garcia and R. P. Schwartz, *Org. Synth., Coll.*, 1988, **6**, 104; 1974, **54**, 58.
  4. Y.-Z. Huang, H. Miao, Q.-H. Zhang, C. Chen and J. Xu, *Catal. Lett.*, 2008, **122**, 344–348.

the mixture was poured into saturated aqueous NaHCO<sub>3</sub> solution and extracted with ether three times. The combined organic layers were dried over Na<sub>2</sub>SO<sub>4</sub> and concentrated in vacuo. Purification by column chromatograph on silica gel.

#### ***General procedure for the preparation of N- phenyl indoles<sup>4</sup>***

A mixture of Iodobenzene (1 mol), Indole (1.5 mol), Cuprous oxide (0.1 mol), Potassium hydroxide (2 mol) and DMSO (2 mL) was stirred at 120 °C under N<sub>2</sub> atmosphere for 24 hours. Then the mixture was poured into H<sub>2</sub>O and extracted with ether three times. The combined organic layers were dried over Na<sub>2</sub>SO<sub>4</sub> and concentrated in vacuo. Purification by column chromatograph on silica gel.

### **3. Experimental procedure for Rh-catalyzed direct carbonylation (Table 2)**

Indole (0.5 mmol), [Rh(COD)Cl]<sub>2</sub> (0.02 mmol), K<sub>2</sub>S<sub>2</sub>O<sub>8</sub> (2.0 mmol), alcohol (2.5 mmol) and toluene (1.0 mL) were added to a 50 mL Schlenk tube. The glass tube was vacuummed and purged with CO (99.99% purity) three times before it was finally pressurized with 1.0 atm CO gas. Then the tube was tightly screw-capped, immersed in an oil bath preheated at 110 °C, and stirred for 24 h. After cooling to room temperature, excess CO was discharged and the resultant reaction mixture was purified by flash chromatography on 200–300-mesh silica gel with petroleum ether/ethyl acetate (50:1-5:1) as eluent to afford the corresponding product.

### **4. Experiments on investigation of mechanism**

#### **4.1 Stoichiometric amount of [Rh(COD)Cl]<sub>2</sub> catalyzed carbonylation of 1a in the absence of K<sub>2</sub>S<sub>2</sub>O<sub>8</sub>**

N-methyl indole (**1a**, 0.5 mmol), [Rh(COD)Cl]<sub>2</sub> (0.25 mmol), *n*-butyl alcohol (2.5 mmol), and toluene (1.0 mL) were added to a 50 mL Schlenk tube. The glass tube was vacuummed and purged with CO (99.99% purity) three times before it was finally pressurized with 1.0 atm CO gas. Then the tube was tightly screw-capped, immersed in an oil bath preheated at 110 °C, and stirred for 24 h. Resultant reaction mixture was

analyzed by HPLC, **BUT no carbonylative reaction was observed. This controll experiment could possibly suggest that Rh(I) itself can not initiate the carbonylation.**

#### **4.2 Stoichiometric amount of RhCl<sub>3</sub> catalyzed carbonylation of 1a in the absence of K<sub>2</sub>S<sub>2</sub>O<sub>8</sub>**

*N*-methyl indole (**1a**, 0.5 mmol), RhCl<sub>3</sub> (0.5 mmol), *n*-butyl alcohol (2.5 mmol) and toluene (1.0 mL) were added to a 50 mL Schlenk tube. The glass tube was vacuummed and purged with CO (99.99% purity) three times before it was finally pressurized with 1.0 atm CO gas. Then the tube was tightly screw-capped, immersed in an oil bath preheated at 110 °C, and stirred for 24 h. Resultant reaction mixture was analyzed by HPLC, and **4% yield of the desired product 3a was obtained. This controll experiment may indicate that Rh(III) can finish the oxidative carbonylation cycle from metallation of C-H bond to the reductive elimination.**

#### **4.3 Pre-oxidized [Rh(COD)Cl]<sub>2</sub> (2.0 mol %) catalyzed direct carbonylation of 1a**

[Rh(COD)Cl]<sub>2</sub> (0.01 mmol), K<sub>2</sub>S<sub>2</sub>O<sub>8</sub> (2.0 mmol) and toluene (1.0 mL) were added to a 50 mL Schlenk tube with a magnetic bar. The glass tube was vacuummed and purged with CO (99.99% purity) three times before it was finally pressurized with 1.0 atm CO gas. Then the tube was tightly screw-capped and immersed in an oil bath preheated at 110 °C for 2 h. Subsequently, *N*-methyl indole (0.5 mmol) and *n*-butyl alcohol (2.5 mmol) were introduced under CO atmosphere and the tube was sealed again to react further for 18 h. After the completion of reaction, **99% yield of the desired product 3a was achieved. This controll experiment may further prove that it is Rh(III) species, which is generated from the oxidation of Rh(I) by excess K<sub>2</sub>S<sub>2</sub>O<sub>8</sub>, initiate the catalytic cycle.**

### **5. Characterization data for products**

**Butyl 1-methylindole-3-carboxylate (3a).**

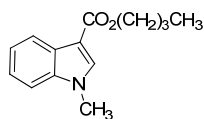

A pale yellow solid.  $^1\text{H}$  NMR (400 MHz,  $\text{CDCl}_3$ )  $\delta$  8.16 (m, 1H), 7.77 (s, 1H), 7.35–7.25 (m, 3H), 4.33 (t,  $J = 6.6$  Hz, 2H), 3.81 (s, 3H), 1.78 (m, 2H), 1.51 (m, 2H), 0.99 (t,  $J = 7.4$  Hz, 3H).  $^{13}\text{C}$  NMR (101 MHz,  $\text{CDCl}_3$ )  $\delta$  164.2 (C=O), 136.2, 134.1, 125.6, 121.7, 120.8, 120.7, 108.7, 106.2, 62.5, 32.4, 30.0, 18.4, 12.8. HRMS (ESI) Calcd for  $\text{C}_{14}\text{H}_{17}\text{NNaO}_2$ :  $[\text{M}+\text{Na}]^+$ , 254.1151; Found: 254.1152.

**Propyl 1-methylindole-3-carboxylate (3b).**

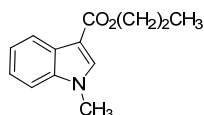

A pale yellow solid.  $^1\text{H}$  NMR (400 MHz,  $\text{CDCl}_3$ )  $\delta$  8.16 (m, 1H), 7.75 (s, 1H), 7.43–7.07 (m, 3H), 4.28 (t,  $J = 6.7$  Hz, 2H), 3.77 (s, 3H), 1.81 (dd,  $J = 14.1, 6.8$  Hz, 2H), 1.05 (t,  $J = 7.4$  Hz, 3H).  $^{13}\text{C}$  NMR (101 MHz,  $\text{CDCl}_3$ )  $\delta$  165.3 (C=O), 137.2, 135.2, 126.6, 122.7, 121.8, 121.7, 109.8, 107.2, 65.3, 33.4, 22.4, 10.7. HRMS (ESI) Calcd for  $\text{C}_{13}\text{H}_{15}\text{NNaO}_2$ :  $[\text{M}+\text{Na}]^+$ , 240.0995; Found: 240.0985.

**Hexyl 1-methylindole-3-carboxylate (3c).**

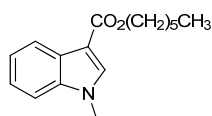

A pale yellow solid.  $^1\text{H}$  NMR (400 MHz,  $\text{CDCl}_3$ )  $\delta$  8.17 (m, 1H), 7.77 (s, 1H), 7.36–7.26 (m, 3H), 4.32 (t,  $J = 6.7$  Hz, 2H), 3.81 (s, 3H), 1.78 (m, 2H), 1.47 (m, 2H), 1.35 (m, 4H), 0.91 (t,  $J = 6.9$  Hz, 3H).  $^{13}\text{C}$  NMR (101 MHz,  $\text{CDCl}_3$ )  $\delta$  165.3 (C=O), 137.2, 135.2, 126.6, 122.7, 121.8, 121.7, 109.8, 107.3, 63.9, 33.4, 31.6, 29.0, 25.9, 22.6, 14.1. HRMS (ESI) Calcd for  $\text{C}_{16}\text{H}_{21}\text{NNaO}_2$ :  $[\text{M}+\text{Na}]^+$ , 282.1441; Found: 282.1465.

**1-Methylbutyl 1-methylindole-3-carboxylate (3d).**

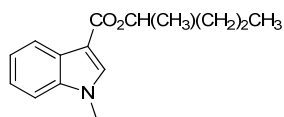

A pale yellow solid.  $^1\text{H}$  NMR (400 MHz,  $\text{CDCl}_3$ )  $\delta$  8.18 (m, 1H), 7.76 (s, 1H), 7.34–7.24 (m, 3H), 5.20 (dd,  $J = 12.8, 6.2$  Hz, 1H), 3.79 (s, 3H), 1.75 (m, 1H), 1.60 (m, 1H), 1.46 (m, 2H), 1.36 (d,  $J = 6.3$  Hz, 3H), 0.95 (t,  $J = 7.3$  Hz, 3H).  $^{13}\text{C}$  NMR (101 MHz,  $\text{CDCl}_3$ )  $\delta$  164.9 (C=O), 137.2, 135.1, 126.7, 122.7, 121.8, 121.7, 109.8, 107.6, 69.9, 38.5, 33.4, 20.5, 18.9, 14.1. HRMS (ESI) Calcd for  $\text{C}_{15}\text{H}_{19}\text{NNaO}_2$ :  $[\text{M}+\text{Na}]^+$ , 268.1332; Found: 268.1324.

**Propyl 5-bromo-1-methylindole-3-carboxylate (3e).**

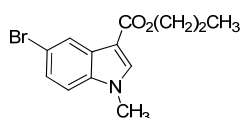

A white solid.  $^1\text{H}$  NMR (400 MHz,  $\text{CDCl}_3$ )  $\delta$  8.22 (d,  $J = 1.5$  Hz, 1H), 7.66 (s, 1H), 7.28 (m, 1H), 7.10 (d,  $J = 8.7$  Hz, 1H), 4.20 (t,  $J = 6.7$  Hz, 2H), 3.71 (s, 3H), 1.74 (m, 2H), 0.98 (t,  $J = 7.4$  Hz, 3H).  $^{13}\text{C}$  NMR (101 MHz,  $\text{CDCl}_3$ )  $\delta$  163.7 (C=O), 134.9, 134.8, 127.1, 124.7, 123.3, 114.5, 110.2, 105.9, 64.5, 32.5, 21.3, 9.6. HRMS (ESI) Calcd for  $\text{C}_{13}\text{H}_{14}\text{BrNNaO}_2$ :  $[\text{M}+\text{Na}]^+$ , 318.0100; Found: 318.0093.

Crystal data for **3e**. Formula  $\text{C}_{13}\text{H}_{14}\text{BrNO}_2$ , colorless crystal, monoclinic, space group  $P21/c$ ;  $a = 13.696(9)$  Å,  $b = 5.641(4)$  Å,  $c = 17.155(11)$  Å,  $\alpha = 90^\circ$ ,  $\beta = 101.063(8)^\circ$ ,  $\gamma = 90^\circ$ ,  $V = 1300.8(15)$  Å<sup>3</sup>;  $Z = 1$ ; crystal size  $0.15 \times 0.20 \times 0.40$  mm<sup>3</sup>; GOF = 0.918; reflections collected 7198; independent reflections: 2305 [ $R_{\text{int}} = 0.1257$ ];  $R_1 = 0.0742$ ;  $wR_2 = 0.2178$ . The crystal structure of **3e** has been deposited at the Cambridge Crystallographic Data Centre and allocated a deposition number: CCDC 838366.

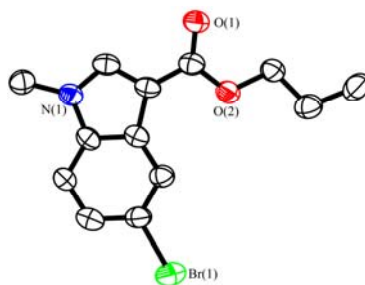

**Scheme 1.** Crystal structure of **3e**

**Butyl 5-bromo-1-methylindole-3-carboxylate (3f).**

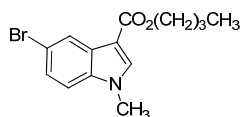

A pale yellow solid.  $^1\text{H}$  NMR (400 MHz,  $\text{CDCl}_3$ )  $\delta$  8.29 (d,  $J = 1.7$  Hz, 1H), 7.74 (s, 1H), 7.36 (m, 1H), 7.19 (d,  $J = 8.7$  Hz, 1H), 4.32 (t,  $J = 6.7$  Hz, 2H), 3.80 (s, 3H), 1.78 (m, 2H), 1.51 (m, 2H), 1.00 (t,  $J = 7.4$  Hz, 3H).  $^{13}\text{C}$  NMR (101 MHz,  $\text{CDCl}_3$ )  $\delta$  164.7 (C=O), 135.9, 128.2, 125.7, 124.3, 115.6, 111.2, 107.0, 63.8, 33.6, 31.0, 19.4, 13.8. HRMS (ESI) Calcd for  $\text{C}_{14}\text{H}_{16}\text{BrNNaO}_2$ :  $[\text{M}+\text{Na}]^+$ , 332.0257; Found: 332.0244.

#### Butyl 6-chloro-1-methylindole-3-carboxylate (3g).

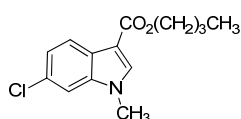

A pale yellow solid.  $^1\text{H}$  NMR (400 MHz,  $\text{CDCl}_3$ )  $\delta$  8.05(m, 1H), 7.75 (s, 1H), 7.34 (d,  $J = 1.5$  Hz, 1H), 7.23 (dd,  $J = 8.5, 1.8$  Hz, 1H), 4.32 (t,  $J = 6.7$  Hz, 2H), 3.79 (s, 3H), 1.87–1.68 (m, 2H), 1.56–1.43 (m, 2H), 0.99 (t,  $J = 7.4$  Hz, 3H).  $^{13}\text{C}$  NMR (101 MHz,  $\text{CDCl}_3$ )  $\delta$  164.8 (C=O), 137.6, 135.6, 128.8, 125.1, 122.7, 122.5, 109.9, 107.6, 63.7, 33.5, 31.0, 19.4, 13.8. HRMS (ESI) Calcd for  $\text{C}_{14}\text{H}_{16}\text{ClNNaO}_2$ :  $[\text{M}+\text{Na}]^+$ , 288.0767; Found: 288.0770.

#### Butyl 1,5-dimethylindole-3-carboxylate (3h).

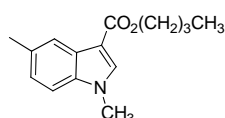

A pale yellow solid.  $^1\text{H}$  NMR (400 MHz,  $\text{CDCl}_3$ )  $\delta$  7.97 (s, 1H), 7.71 (s, 1H), 7.21 (d,  $J = 8.4$  Hz, 1H), 7.11 (m, 1H), 4.32 (t,  $J = 6.7$  Hz, 2H), 3.77 (s, 3H), 2.49 (s, 3H), 1.77 (m, 2H), 1.52 (m, 2H), 0.99 (t,  $J = 7.4$  Hz, 3H).  $^{13}\text{C}$  NMR (101 MHz,  $\text{CDCl}_3$ )  $\delta$  165.3 (C=O), 135.6, 135.1, 131.4, 126.9, 124.3, 121.4, 109.4, 106.6, 63.5, 33.4, 31.1, 21.6, 19.4, 13.9. HRMS (ESI) Calcd for  $\text{C}_{15}\text{H}_{19}\text{NNaO}_2$ :  $[\text{M}+\text{Na}]^+$ , 268.1308; Found: 268.1297.

#### Butyl 1-benzylindole-3-carboxylate (3i).

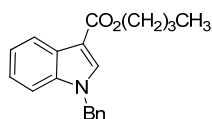

A pale yellow solid.  $^1\text{H}$  NMR (400 MHz,  $\text{CDCl}_3$ )  $\delta$  8.19 (m, 1H), 7.86 (s, 1H), 7.35–7.26 (m, 5H), 7.23 (m, 1H), 7.15 (m, 2H), 5.34 (s, 2H), 4.34 (t,  $J = 6.7$  Hz, 2H), 1.78 (m, 2H), 1.51 (m, 2H), 0.99 (t,  $J = 7.4$  Hz, 3H).  $^{13}\text{C}$  NMR (101 MHz,  $\text{CDCl}_3$ )  $\delta$  165.3 (C=O), 136.8, 136.0, 134.6, 129.0, 128.1, 127.0, 126.8, 122.9, 122.0, 121.8, 110.3, 108.0, 63.7, 50.7, 31.1, 19.4, 13.9. HRMS (ESI) Calcd for  $\text{C}_{20}\text{H}_{21}\text{NNaO}_2$ :  $[\text{M}+\text{Na}]^+$ , 330.1465; Found: 330.1455.

### Hexyl 1-benzylindole-3-carboxylate (3j).

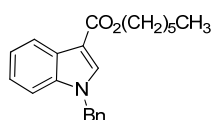

A pale yellow solid.  $^1\text{H}$  NMR (400 MHz,  $\text{CDCl}_3$ )  $\delta$  8.20 (m, 1H), 7.84 (s, 1H), 7.33–7.18 (m, 6H), 7.15–7.09 (m, 2H), 5.29 (s, 2H), 4.32 (t,  $J = 6.7$  Hz, 2H), 1.85–1.70 (m, 2H), 1.54–1.40 (m, 2H), 1.34 (m, 4H), 0.90 (t,  $J = 7.1$ , 3H).  $^{13}\text{C}$  NMR (101 MHz,  $\text{CDCl}_3$ )  $\delta$  165.2 (C=O), 136.8, 136.0, 134.6, 128.9, 128.1, 127.0, 126.8, 122.9, 122.0, 121.8, 110.3, 107.9, 64.0, 50.7, 31.5, 28.9, 25.8, 22.6, 14.0. HRMS (ESI) Calcd for  $\text{C}_{22}\text{H}_{25}\text{NNaO}_2$ :  $[\text{M}+\text{Na}]^+$ , 358.1778; Found: 358.1766.

### Isobutyl 1-benzylindole-3-carboxylate (3k).

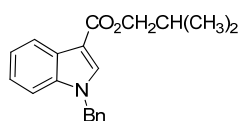

A pale yellow solid.  $^1\text{H}$  NMR (400 MHz,  $\text{CDCl}_3$ )  $\delta$  8.20 (m, 1H), 7.85 (s, 1H), 7.30–7.26 (m, 2H), 7.26–7.18 (m, 4H), 7.12–7.08 (m, 2H), 5.26 (s, 2H), 4.12 (d,  $J = 6.6$  Hz, 2H), 2.10 (m, 1H), 1.04 (d,  $J = 6.7$  Hz, 6H).  $^{13}\text{C}$  NMR (101 MHz,  $\text{CDCl}_3$ )  $\delta$  165.3 (C=O), 136.8, 136.1, 134.8, 129.0, 128.1, 127.0, 126.8, 123.0, 122.1, 121.9, 110.4, 108.0, 70.1, 50.7, 28.1, 19.5. HRMS (ESI) Calcd for  $\text{C}_{20}\text{H}_{21}\text{NNaO}_2$ :  $[\text{M}+\text{Na}]^+$ , 330.1465; Found: 330.1460.

### Butyl 1-benzyl-5-methylindole-3-carboxylate (3l).



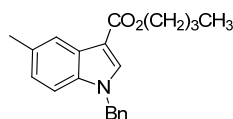

A pale yellow solid.  $^1\text{H}$  NMR (400 MHz,  $\text{CDCl}_3$ )  $\delta$  7.99 (d,  $J = 0.7$  Hz, 1H), 7.80 (s, 1H), 7.35–7.25 (m, 3H), 7.21–7.08 (m, 3H), 7.05 (m, 1H), 5.29 (s, 2H), 4.33 (t,  $J = 6.7$  Hz, 2H), 2.47 (s, 3H), 1.78 (m, 2H), 1.57–1.44 (m, 2H), 0.99 (t,  $J = 7.4$  Hz, 3H).  $^{13}\text{C}$  NMR (101 MHz,  $\text{CDCl}_3$ )  $\delta$  165.3 (C=O), 136.1, 135.2, 134.6, 131.5, 129.0, 128.1, 127.1, 127.0, 124.5, 121.5, 110.0, 107.3, 63.6, 50.8, 31.1, 21.6, 19.4, 13.9. HRMS (ESI) Calcd for  $\text{C}_{21}\text{H}_{23}\text{NNaO}_2$ :  $[\text{M}+\text{Na}]^+$ , 344.1621; Found: 344.1619.

**Butyl 1-benzyl-6-methylindole-3-carboxylate (3m).**

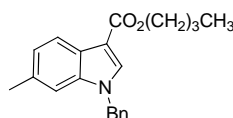

A pale yellow solid.  $^1\text{H}$  NMR (400 MHz,  $\text{CDCl}_3$ )  $\delta$  7.97 (d,  $J = 8.1$  Hz, 1H), 7.68 (s, 1H), 7.25–7.18 (m, 3H), 7.05–6.98 (m, 4H), 5.17 (s, 2H), 4.24 (t,  $J = 6.7$  Hz, 2H), 2.34 (s, 3H), 1.68 (m, 2H), 1.42 (m, 2H), 0.90 (t,  $J = 7.4$  Hz, 3H).  $^{13}\text{C}$  NMR (101 MHz,  $\text{CDCl}_3$ )  $\delta$  164.3 (C=O), 136.1, 135.1, 133.0, 131.8, 127.9, 127.0, 125.9, 123.5, 122.7, 120.4, 109.1, 106.8, 62.5, 49.4, 30.0, 20.8, 18.4, 12.8. HRMS (ESI) Calcd for  $\text{C}_{21}\text{H}_{23}\text{NNaO}_2$ :  $[\text{M}+\text{Na}]^+$ , 344.1621; Found: 344.1619.

**Butyl 1-allylindole-3-carboxylate (3n).**

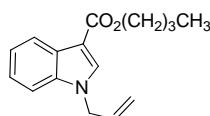

A pale yellow solid.  $^1\text{H}$  NMR (400 MHz,  $\text{CDCl}_3$ )  $\delta$  8.18 (m, 1H), 7.82 (s, 1H), 7.33 (m, 1H), 7.29–7.24 (m, 2H), 5.99 (m, 1H), 5.26 (m, 1H), 5.14 (m, 1H), 4.81–4.67 (m, 2H), 4.34 (t,  $J = 6.7$  Hz, 2H), 1.78 (m, 2H), 1.51 (m, 2H), 0.99 (t,  $J = 7.4$  Hz, 3H).  $^{13}\text{C}$  NMR (101 MHz,  $\text{CDCl}_3$ )  $\delta$  165.3 (C=O), 136.6, 134.3, 132.2, 126.8, 122.8, 121.9, 121.8, 118.5, 110.2, 107.7, 63.6, 49.3, 31.1, 19.4, 13.9. HRMS (ESI) Calcd for  $\text{C}_{16}\text{H}_{19}\text{NNaO}_2$ :  $[\text{M}+\text{Na}]^+$ , 280.1308; Found: 280.1306.

**Butyl 1-allyl-5-methylindole-3-carboxylate (3o).**

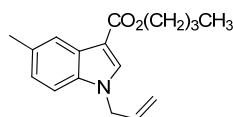

A pale yellow solid.  $^1\text{H}$  NMR (400 MHz,  $\text{CDCl}_3$ )  $\delta$  7.96 (m, 1H), 7.77 (s, 1H), 7.22 (d,  $J = 8.4$  Hz, 1H), 7.09 (m, 1H), 5.98 (m, 1H), 5.25 (m, 1H), 5.13 (m, 1H), 4.72 (m, 2H), 4.33 (t,  $J = 6.7$  Hz, 2H), 2.49 (s, 3H), 1.86–1.72 (m, 2H), 1.58–1.45 (m, 2H), 1.00 (t,  $J = 7.4$  Hz, 3H).  $^{13}\text{C}$  NMR (101 MHz,  $\text{CDCl}_3$ )  $\delta$  165.3 (C=O), 135.0, 134.2, 132.3, 131.4, 127.0, 124.3, 121.5, 118.4, 109.8, 107.1, 63.5, 49.4, 31.1, 21.6, 19.4, 13.9. HRMS (ESI) Calcd for  $\text{C}_{17}\text{H}_{21}\text{NNaO}_2$ :  $[\text{M}+\text{Na}]^+$ , 294.1465; Found: 294.1470.

**Butyl 1-allyl-6-methylindole-3-carboxylate (3p).**

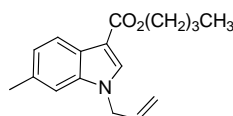

A pale yellow solid.  $^1\text{H}$  NMR (400 MHz,  $\text{CDCl}_3$ )  $\delta$  7.96 (d,  $J = 8.4$  Hz, 1H), 7.67 (s, 1H), 7.02 (d,  $J = 8.2$  Hz, 2H), 5.90 (m, 1H), 5.17 (m, 1H), 5.04 (m, 1H), 4.65–4.57 (m, 2H), 4.24 (t,  $J = 6.7$  Hz, 2H), 2.40 (s, 3H), 1.68 (m, 2H), 1.42 (m, 2H), 0.91 (t,  $J = 7.4$  Hz, 3H).  $^{13}\text{C}$  NMR (101 MHz,  $\text{CDCl}_3$ )  $\delta$  165.4 (C=O), 137.0, 133.8, 132.7, 132.3, 124.6, 123.7, 121.4, 118.3, 110.1, 107.6, 63.6, 49.2, 31.1, 21.9, 19.4, 13.9. HRMS (ESI) Calcd for  $\text{C}_{17}\text{H}_{21}\text{NNaO}_2$ :  $[\text{M}+\text{Na}]^+$ , 294.1465; Found: 294.1470.

**Butyl 1-allyl-5-bromoindole-3-carboxylate (3q).**

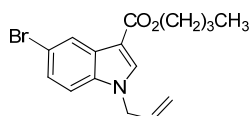

A pale yellow solid.  $^1\text{H}$  NMR (400 MHz,  $\text{CDCl}_3$ )  $\delta$  8.31 (d,  $J = 1.9$  Hz, 1H), 7.78 (s, 1H), 7.33 (m, 1H), 7.17 (d,  $J = 8.7$  Hz, 1H), 5.95 (m, 1H), 5.27 (m, 1H), 5.10 (m, 1H), 4.70 (m, 2H), 4.32 (t,  $J = 6.7$  Hz, 2H), 1.83–1.73 (m, 2H), 1.56–1.44 (m, 2H), 1.00 (t,  $J = 7.4$  Hz, 3H).  $^{13}\text{C}$  NMR (101 MHz,  $\text{CDCl}_3$ )  $\delta$  164.7 (C=O), 135.3, 135.0, 131.8, 128.3, 125.7, 124.4, 118.7, 115.6, 111.7, 107.3, 63.8, 49.5, 31.0, 19.4, 13.8. HRMS (ESI) Calcd for  $\text{C}_{16}\text{H}_{18}\text{BrNNaO}_2$ :  $[\text{M}+\text{Na}]^+$ , 358.0413; Found: 358.0412.

**Butyl 1-phenylindole-3-carboxylate (3r).**

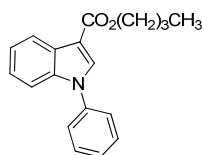

A yellow solid.  $^1\text{H}$  NMR (400 MHz,  $\text{CDCl}_3$ )  $\delta$  8.25 (m, 1H), 8.03 (s, 1H), 7.57–7.42 (m, 5H), 7.43 (m, 1H), 7.35–7.25 (m, 2H), 4.37 (t,  $J$  = 6.6 Hz, 2H), 1.84–1.77 (m, 2H), 1.61–1.43 (m, 2H), 1.00 (t,  $J$  = 7.4 Hz, 3H).  $^{13}\text{C}$  NMR (101 MHz,  $\text{CDCl}_3$ )  $\delta$  165.2 (C=O), 138.6, 136.7, 134.1, 129.8, 127.8, 127.0, 124.9, 123.4, 122.5, 121.9, 111.0, 109.5, 63.8, 31.1, 19.4, 13.9. HRMS (ESI) Calcd for  $\text{C}_{19}\text{H}_{20}\text{NO}_2$ :  $[\text{M}+\text{H}]^+$ , 294.1465; Found: 294.1475.

### Menthyl 1-methylindole-3-carboxylate (3u).

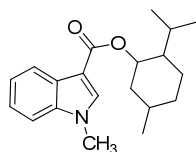

A white solid.  $^1\text{H}$  NMR (400 MHz,  $\text{CDCl}_3$ )  $\delta$  8.17 (m, 1H), 7.79 (s, 1H), 7.39–7.27 (m, 3H), 4.96 (m, 1H), 3.84 (s, 3H), 2.18 (d,  $J$  = 12.1 Hz, 1H), 2.03 (m, 1H), 1.74 (d,  $J$  = 11.5 Hz, 2H), 1.68–1.52 (m, 3H), 1.20–1.07 (m, 2H), 0.93 (dd,  $J$  = 6.8, 2.8 Hz, 6H), 0.81 (d,  $J$  = 6.9 Hz, 3H).  $^{13}\text{C}$  NMR (101 MHz,  $\text{CDCl}_3$ )  $\delta$  164.8 (C=O), 137.2, 135.1, 126.7, 122.7, 121.8, 109.7, 107.6, 73.3, 47.5, 41.5, 34.5, 33.4, 31.5, 26.5, 23.7, 22.1, 20.9, 16.6. HRMS (ESI) Calcd for  $\text{C}_{20}\text{H}_{27}\text{NNaO}_2$ :  $[\text{M}+\text{Na}]^+$ , 336.1934; Found: 336.1933.

### Butyl 1-benzylpyrrole-3-carboxylate (3v).

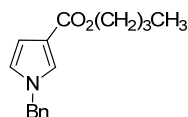

A pale yellow solid.  $^1\text{H}$  NMR (400 MHz,  $\text{CDCl}_3$ )  $\delta$  7.34–7.32 (m, 4H), 7.19–7.09 (m, 2H), 6.61 (d,  $J$  = 1.9 Hz, 2H), 5.05 (s, 2H), 4.21 (t,  $J$  = 6.7 Hz, 2H), 1.68 (m, 2H), 1.50–1.37 (m, 2H), 0.95 (t,  $J$  = 7.4 Hz, 3H).  $^{13}\text{C}$  NMR (101 MHz,  $\text{CDCl}_3$ )  $\delta$  164.9 (C=O), 136.7, 128.9, 128.1, 127.2, 126.3, 122.0, 116.6, 110.5, 63.6, 53.8, 31.0, 19.3, 13.8. HRMS (ESI) Calcd for  $\text{C}_{16}\text{H}_{19}\text{NNaO}_2$ :  $[\text{M}+\text{Na}]^+$ , 280.1308; Found: 280.1316.

**Butyl indole-3-carboxylate (3w).**

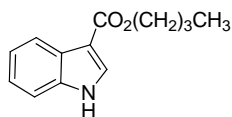

A white solid.  $^1\text{H}$  NMR (400 MHz,  $\text{CDCl}_3$ )  $\delta$  8.56 (s, 1H), 8.19 (m, 1H), 7.94 (d,  $J$  = 3.0 Hz, 1H), 7.42 (m, 1H), 7.31–7.26 (m, 2H), 4.35 (t,  $J$  = 6.6 Hz, 2H), 1.80 (m, 2H), 1.53 (m, 2H), 1.00 (t,  $J$  = 7.4 Hz, 3H).  $^{13}\text{C}$  NMR (101 MHz,  $\text{CDCl}_3$ )  $\delta$  165.3 (C=O), 136.1, 131.0, 125.8, 123.2, 122.0, 121.6, 111.4, 109.3, 63.7, 31.0, 19.4, 13.8. HRMS (ESI) Calcd for  $\text{C}_{13}\text{H}_{15}\text{NNaO}_2$ :  $[\text{M}+\text{Na}]^+$ , 240.0995; Found: 240.0996.

**Butyl 7-methylindole-3-carboxylate (3x).**

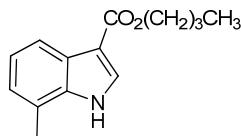

A pale yellow solid.  $^1\text{H}$  NMR (400 MHz,  $\text{CDCl}_3$ )  $\delta$  8.75 (s, 1H), 7.94 (d,  $J$  = 8.0 Hz, 1H), 7.83 (d,  $J$  = 3.0 Hz, 1H), 7.11 (t,  $J$  = 7.6 Hz, 1H), 6.99 (d,  $J$  = 7.2 Hz, 1H), 4.27 (t,  $J$  = 6.6 Hz, 2H), 2.43 (s, 3H), 1.72 (m, 2H), 1.44 (m, 2H), 0.92 (t,  $J$  = 7.4 Hz, 3H).  $^{13}\text{C}$  NMR (101 MHz,  $\text{CDCl}_3$ )  $\delta$  164.6 (C=O), 134.7, 129.8, 124.4, 122.6, 121.1, 119.7, 118.2, 108.4, 62.7, 30.0, 18.4, 15.5, 12.8. HRMS (ESI) Calcd for  $\text{C}_{14}\text{H}_{18}\text{NO}_2$ :  $[\text{M}+\text{H}]^+$ , 232.1259; Found: 232.1284.

**Butyl 6-chloro-indole-3-carboxylate (3y).**

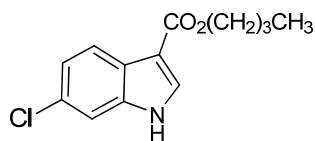

A pale yellow solid.  $^1\text{H}$  NMR (400 MHz,  $\text{CDCl}_3$ )  $\delta$  8.89 (s, 1H), 7.99 (d,  $J$  = 8.6 Hz, 1H), 7.80 (d,  $J$  = 2.9 Hz, 1H), 7.31 (d,  $J$  = 1.7 Hz, 1H), 7.15 (dd,  $J$  = 8.6, 1.8 Hz, 1H), 4.27 (t,  $J$  = 6.7 Hz, 2H), 1.71 (m, 2H), 1.42 (m, 2H), 0.91 (t,  $J$  = 7.4 Hz, 3H).  $^{13}\text{C}$  NMR (101 MHz,  $\text{CDCl}_3$ )  $\delta$  165.2 (C=O), 136.5, 131.6, 129.1, 124.4, 122.7, 122.5, 111.6, 109.2, 64.0, 31.0, 19.4, 13.8. HRMS (ESI) Calcd for  $\text{C}_{13}\text{H}_{14}\text{ClNNaO}_2$ :  $[\text{M}+\text{Na}]^+$ , 274.0605; Found: 274.2704.

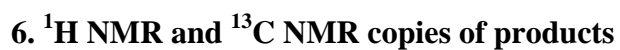

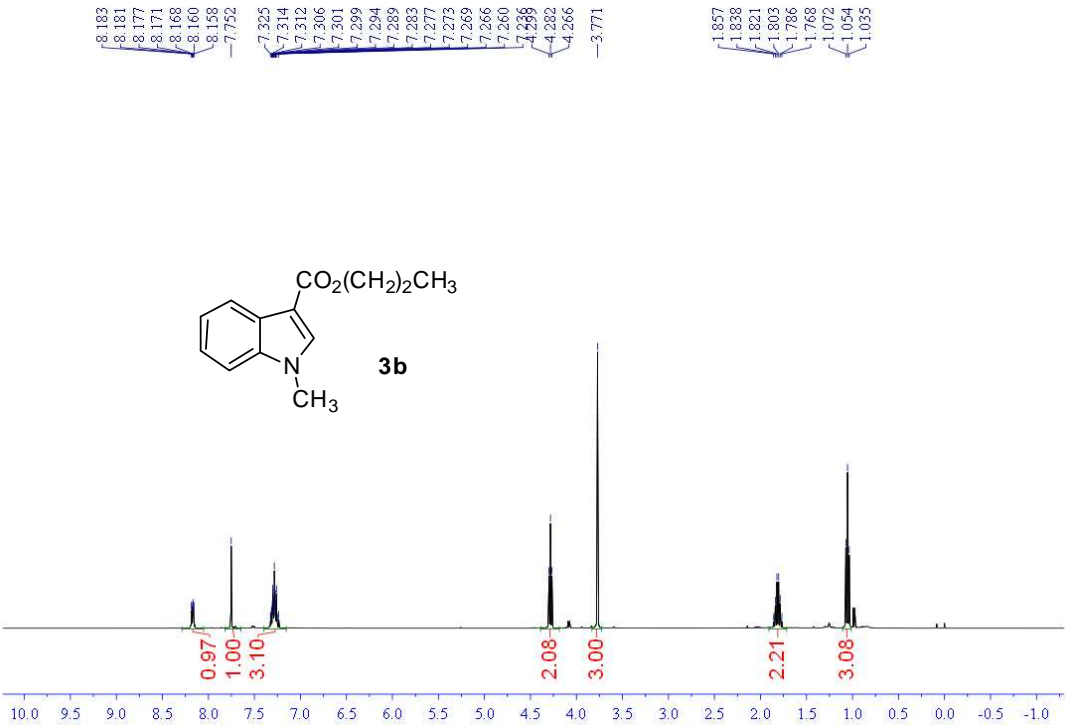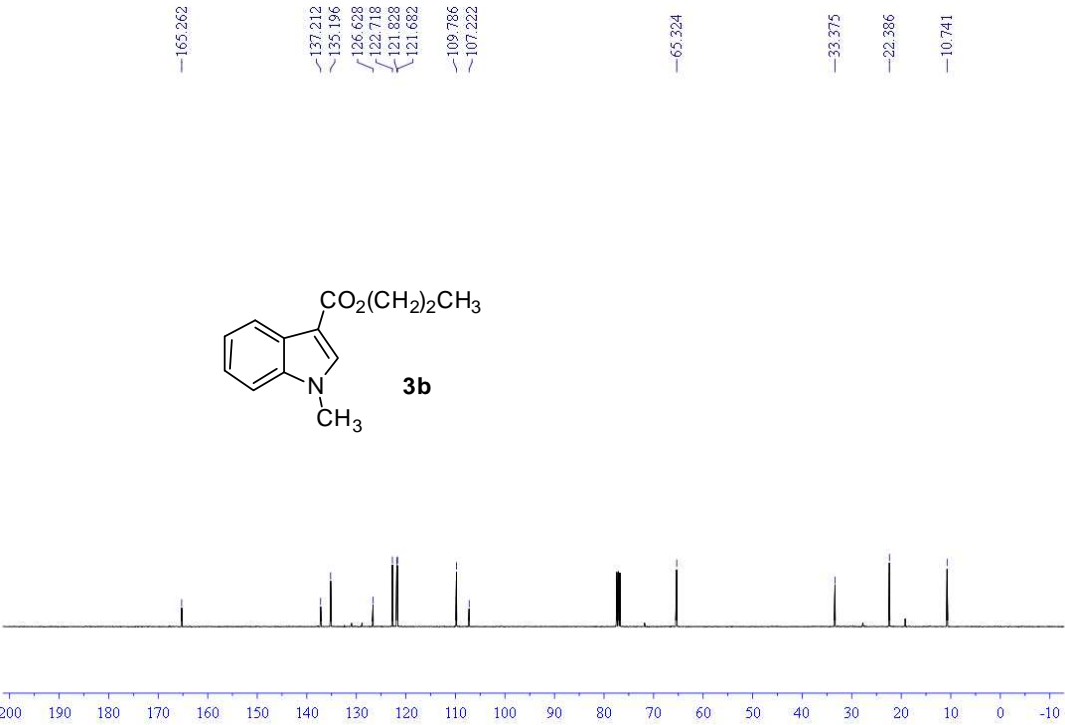

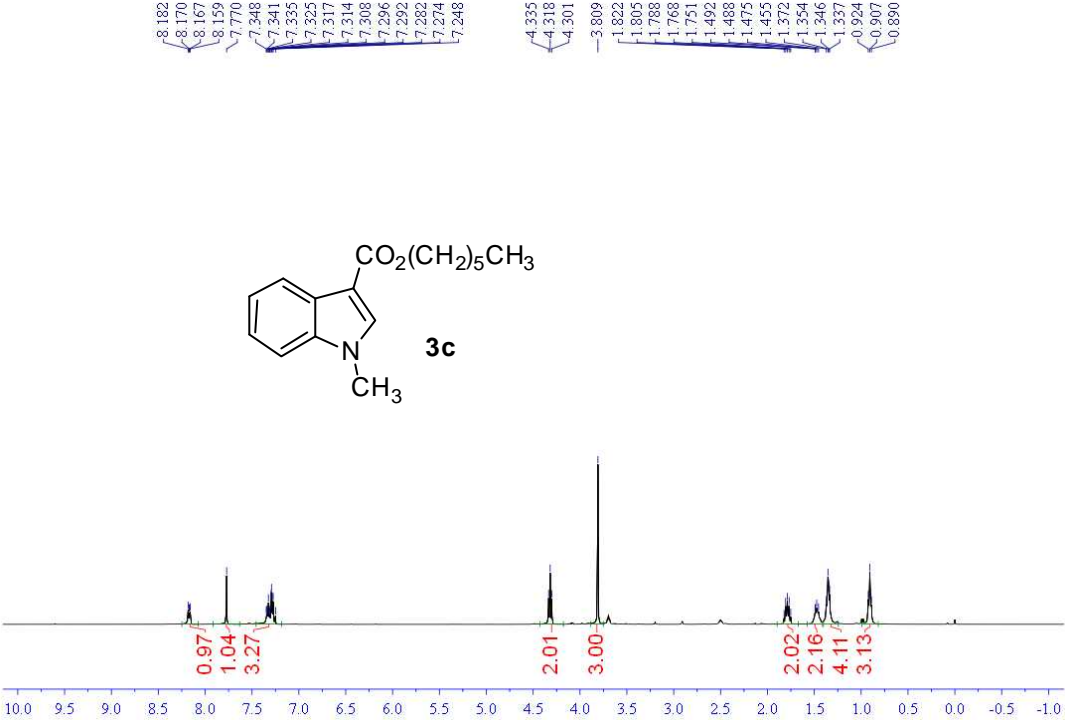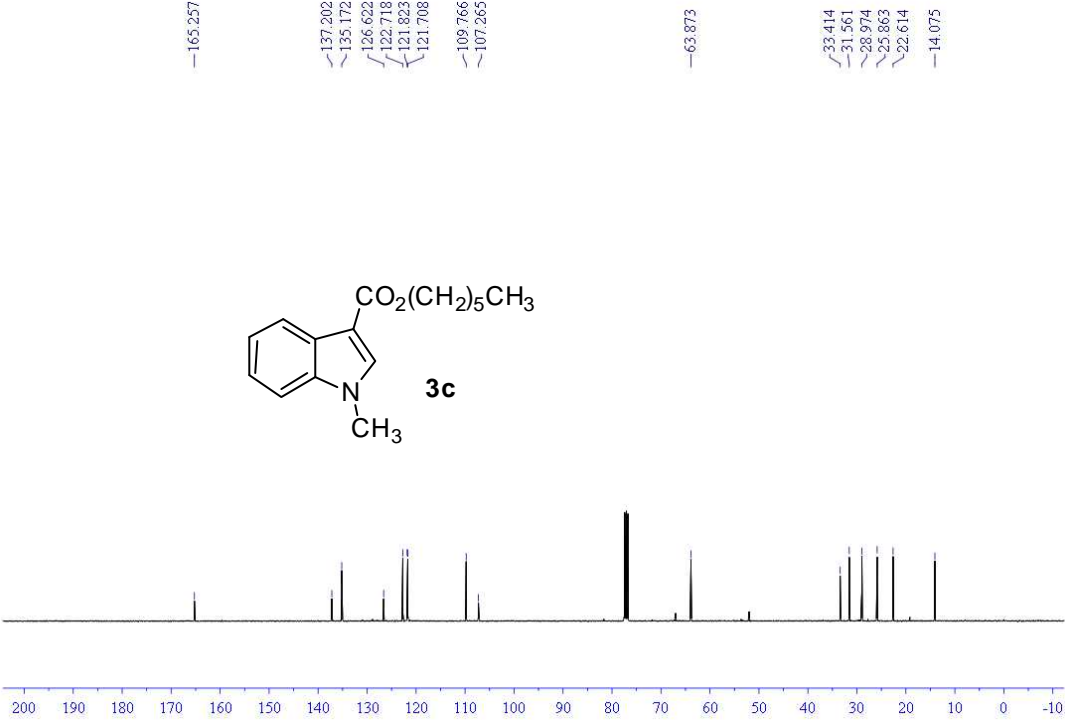

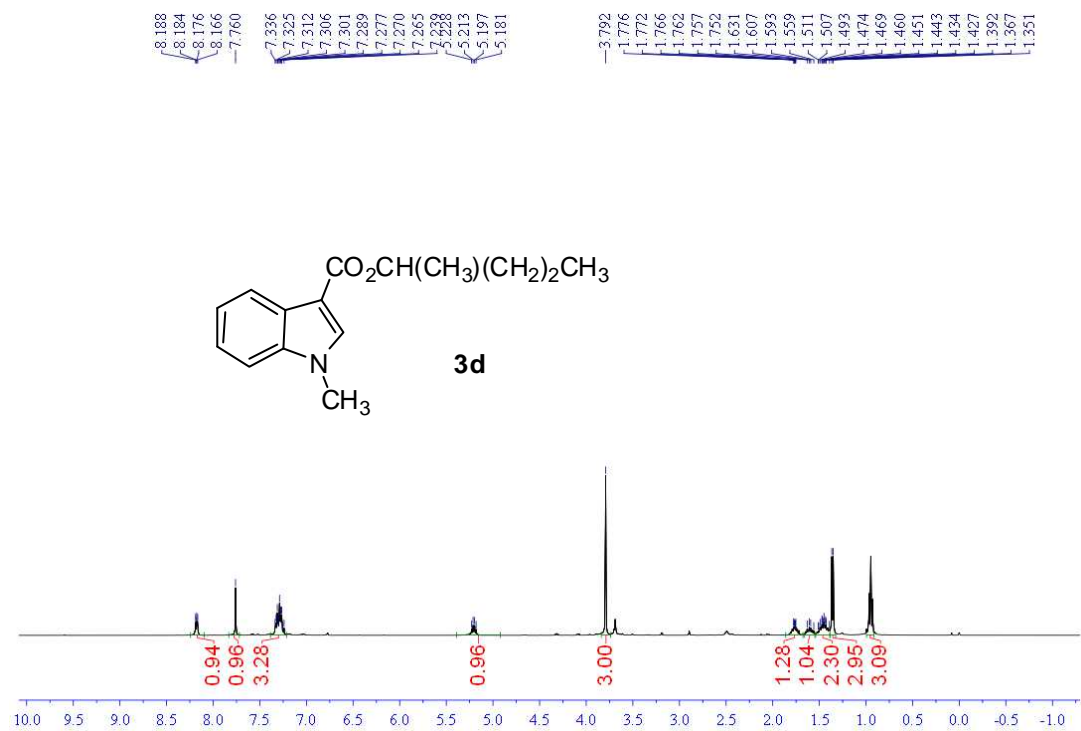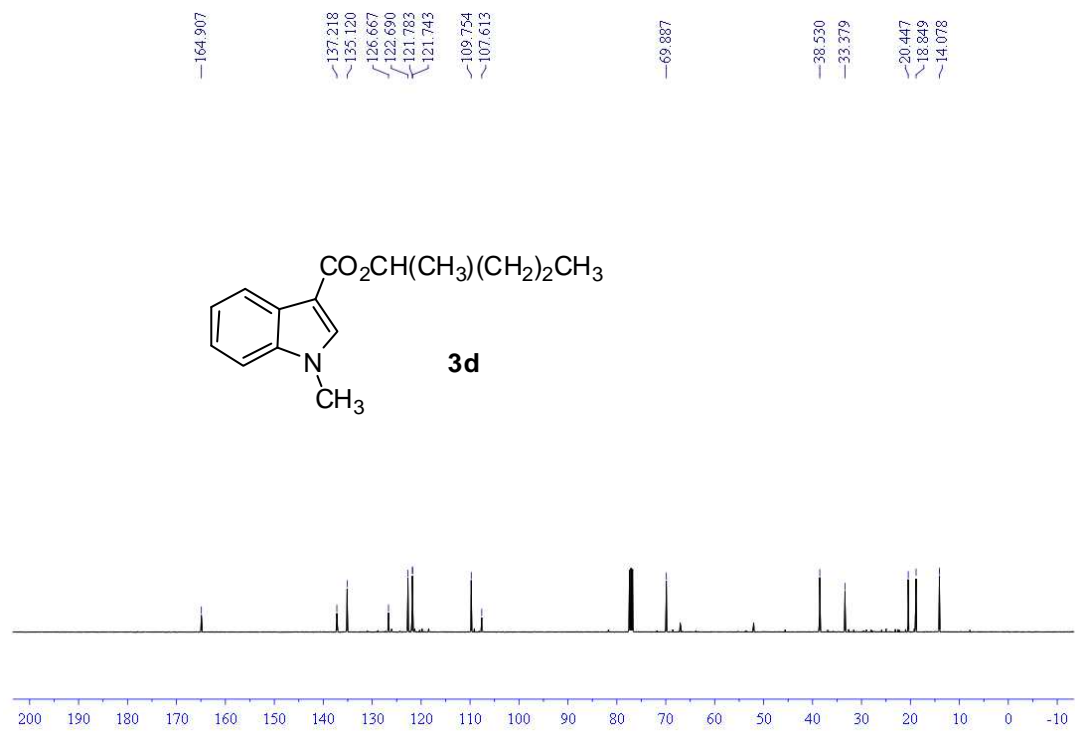



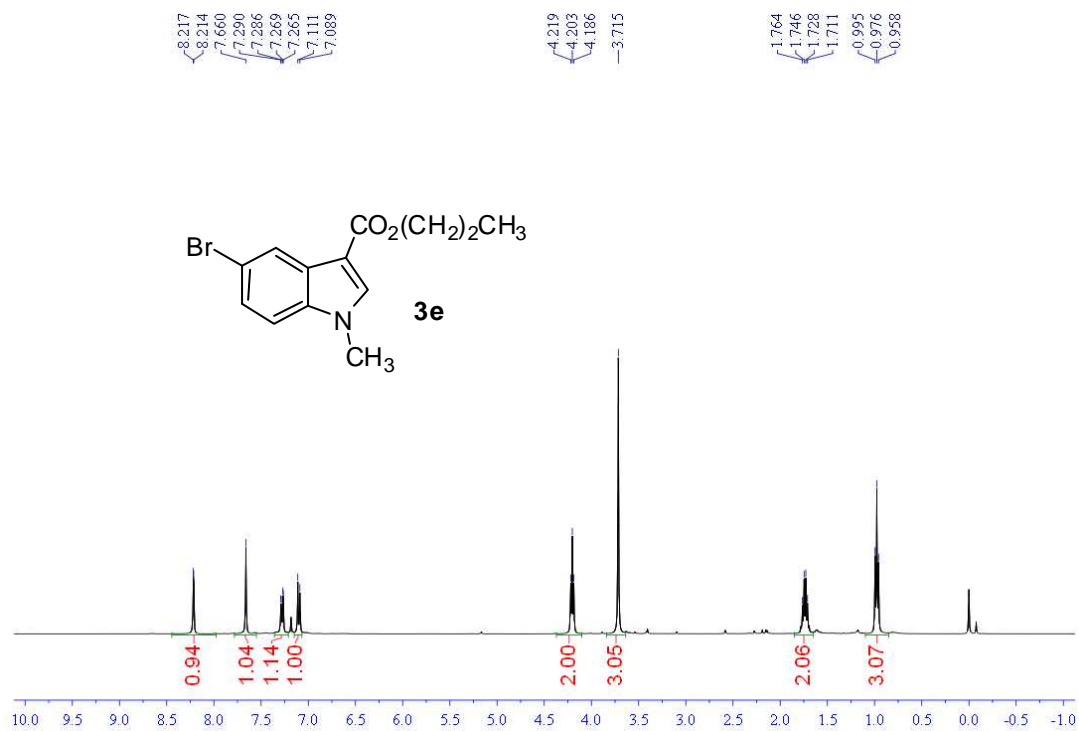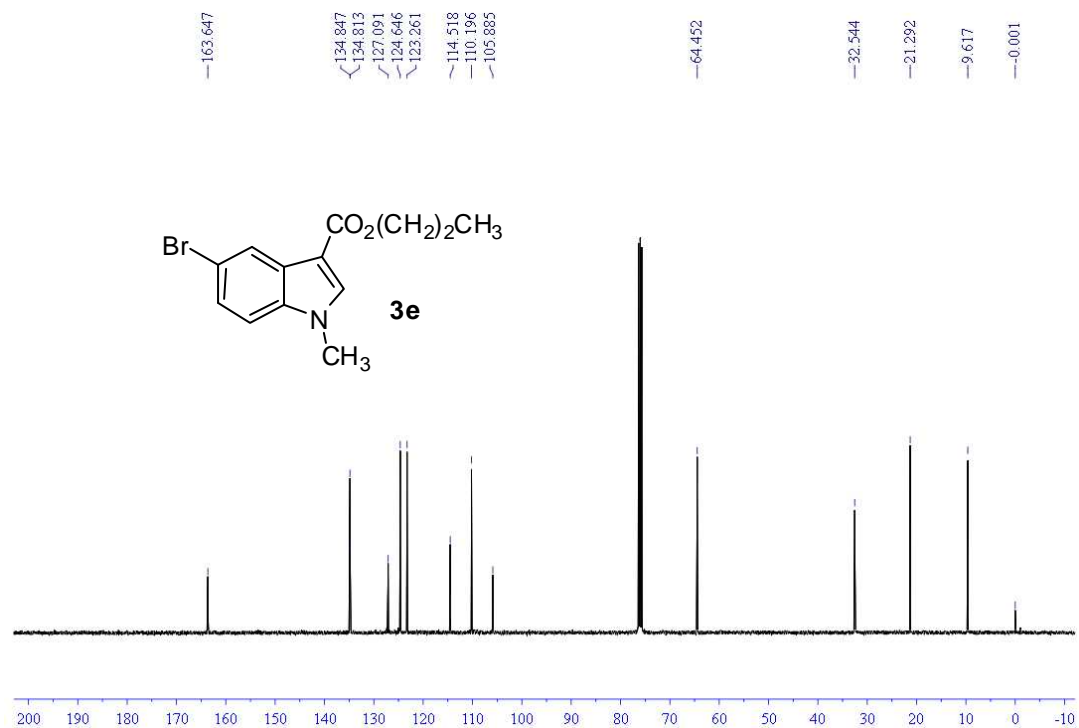

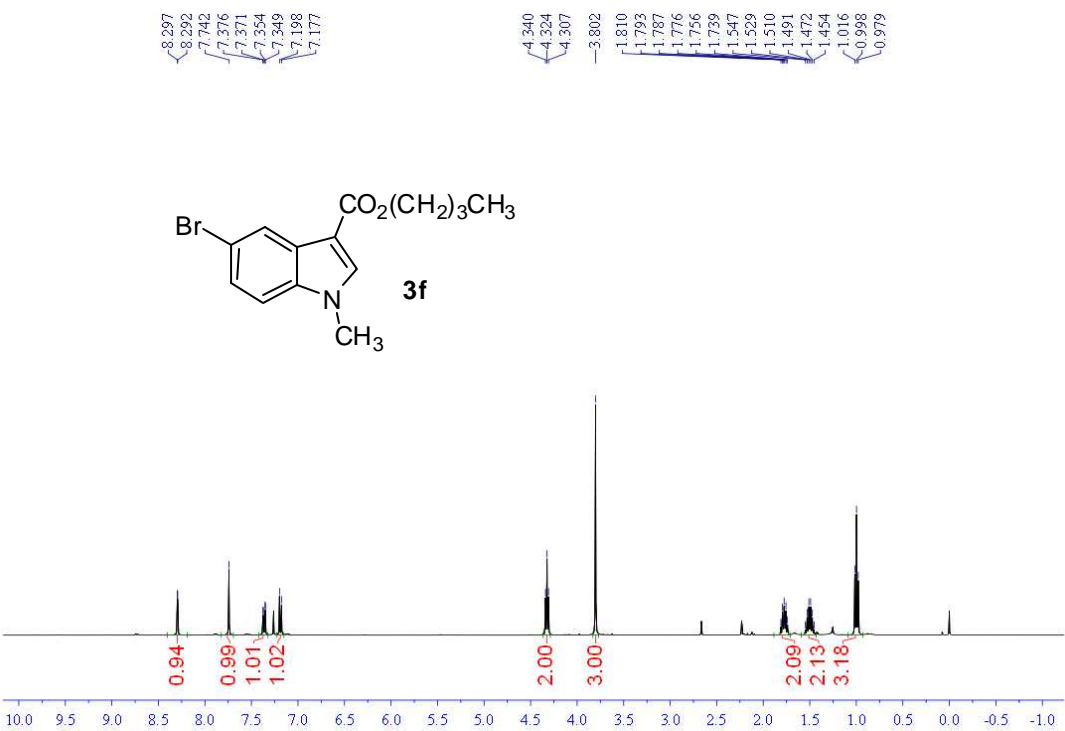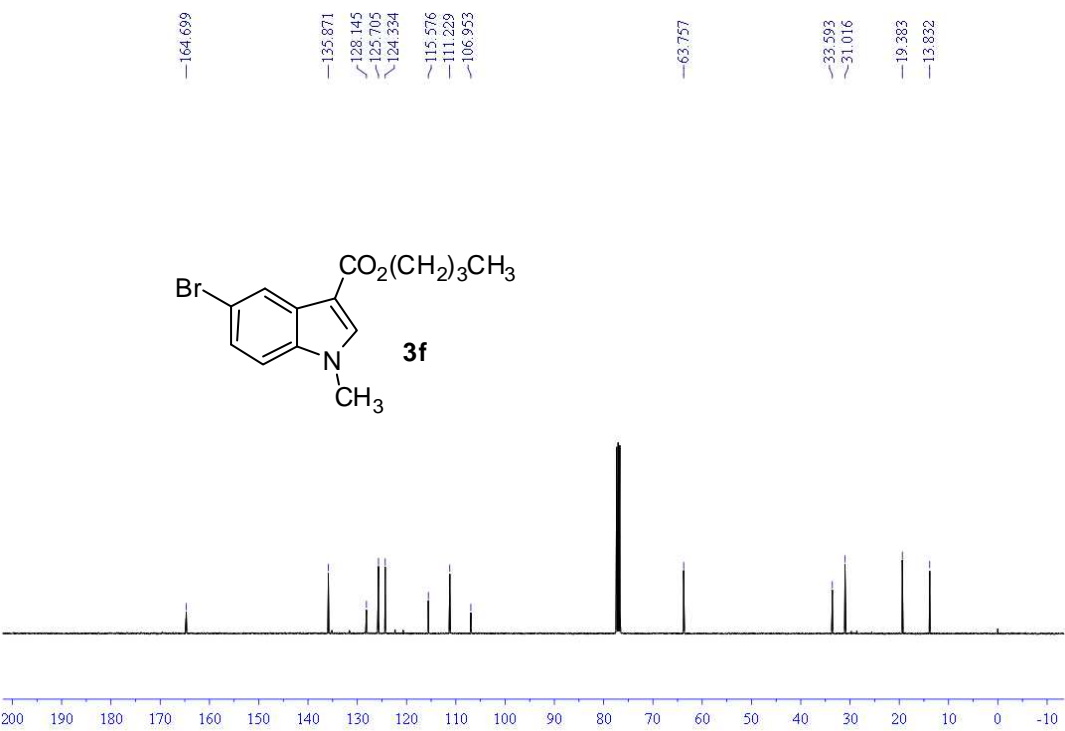

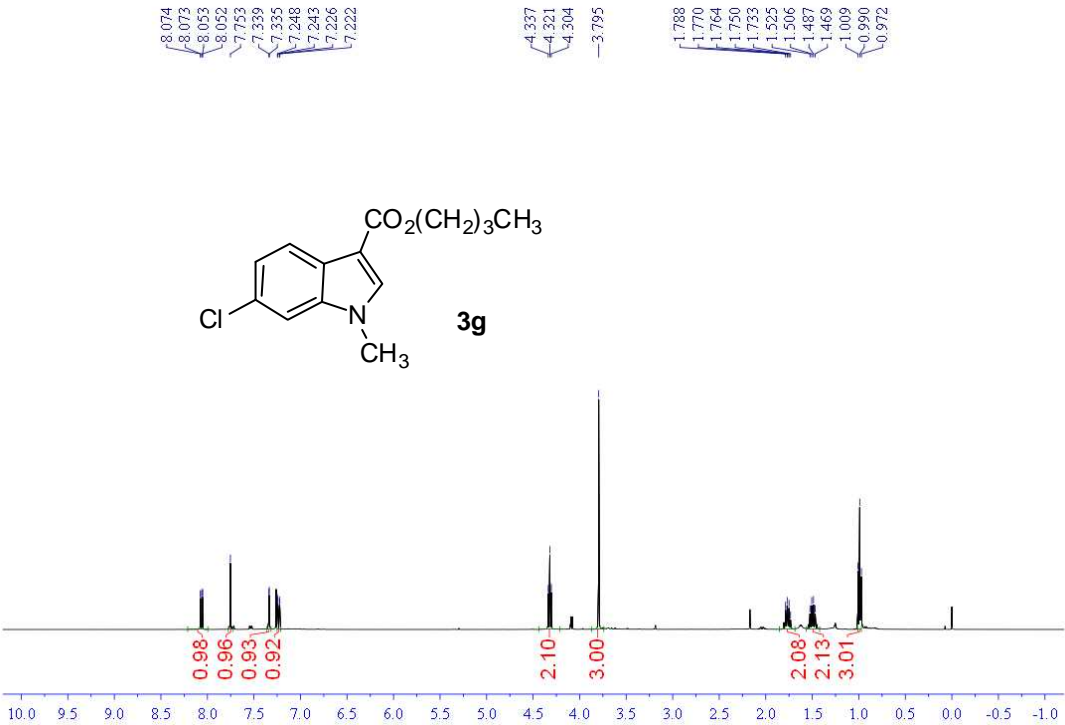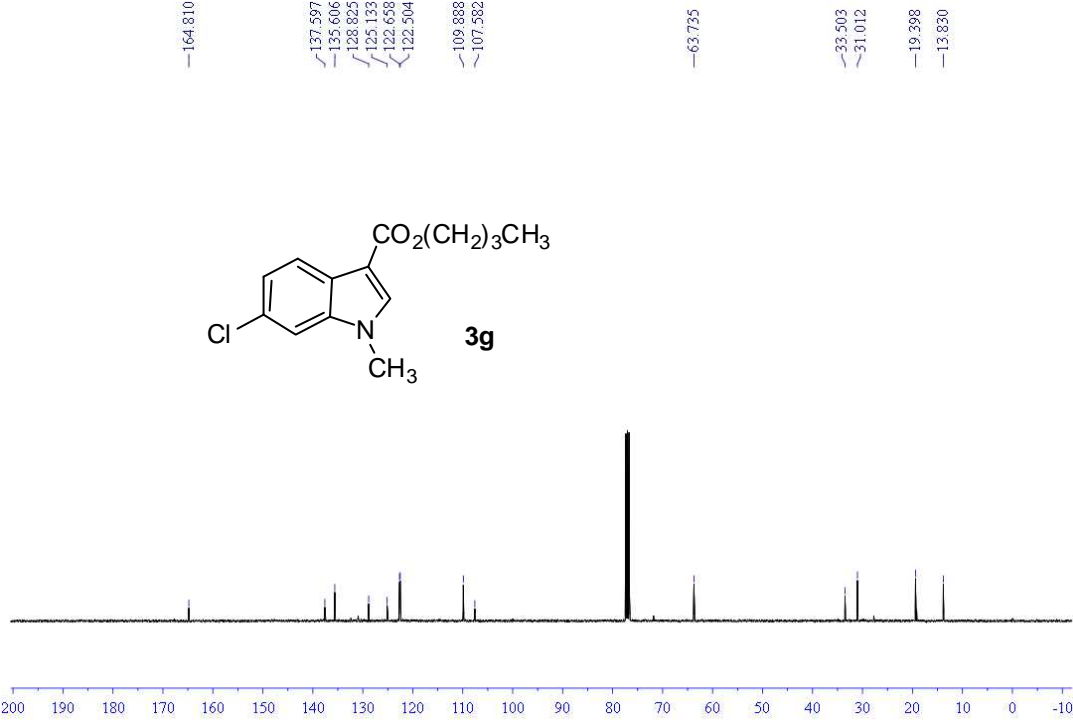

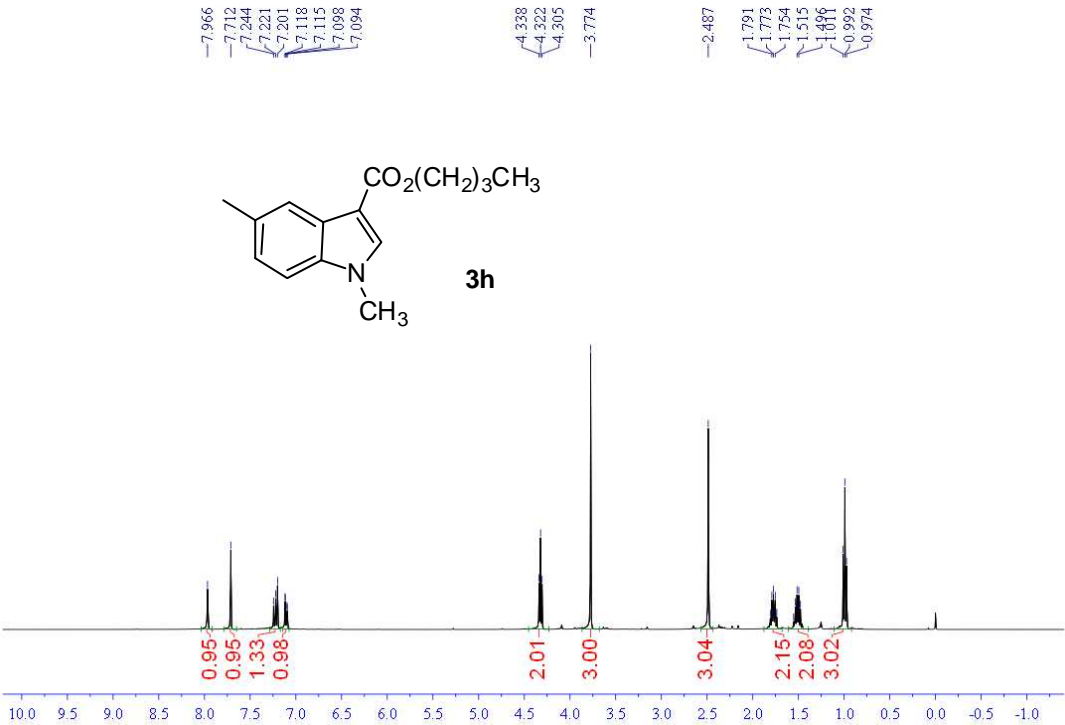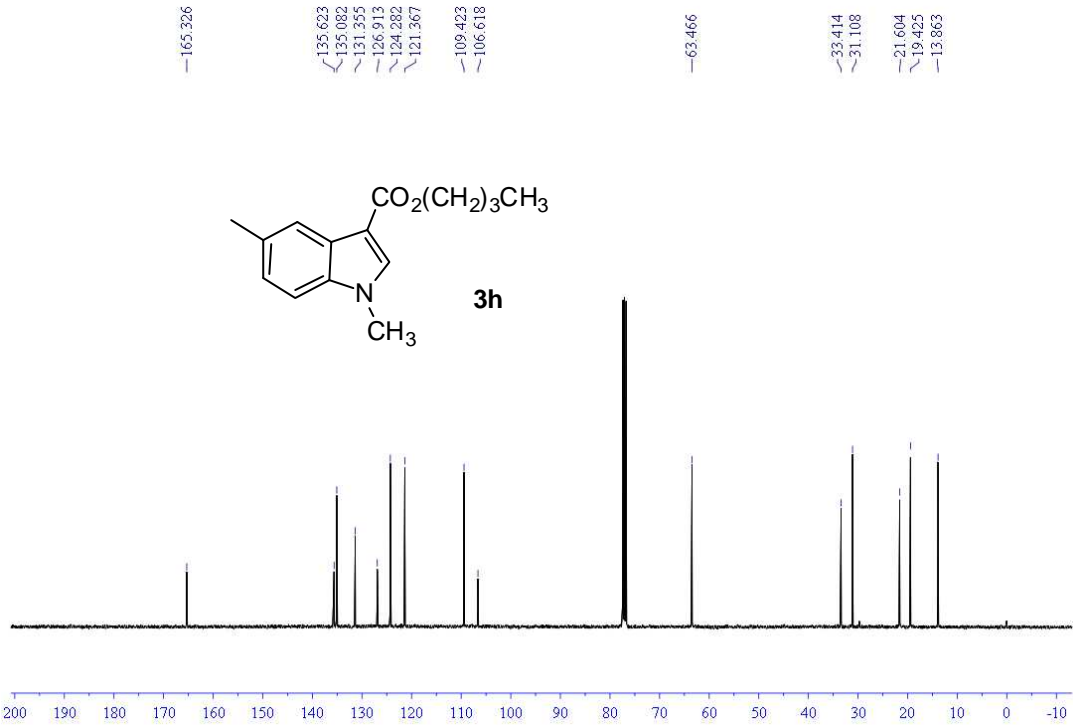

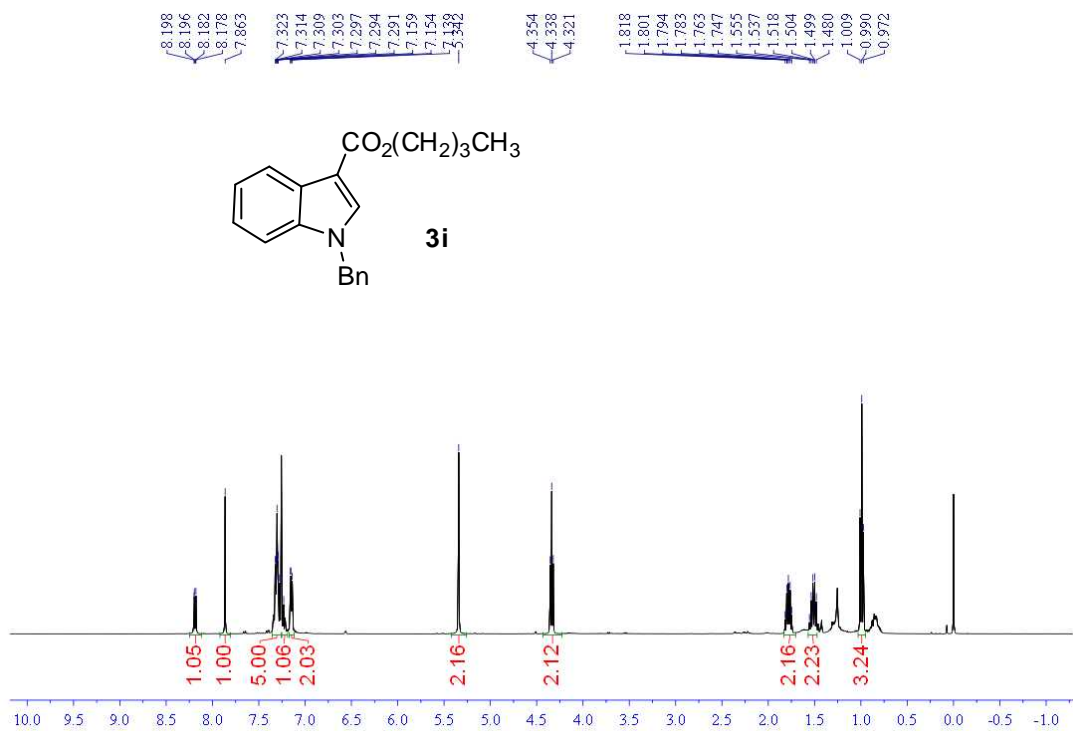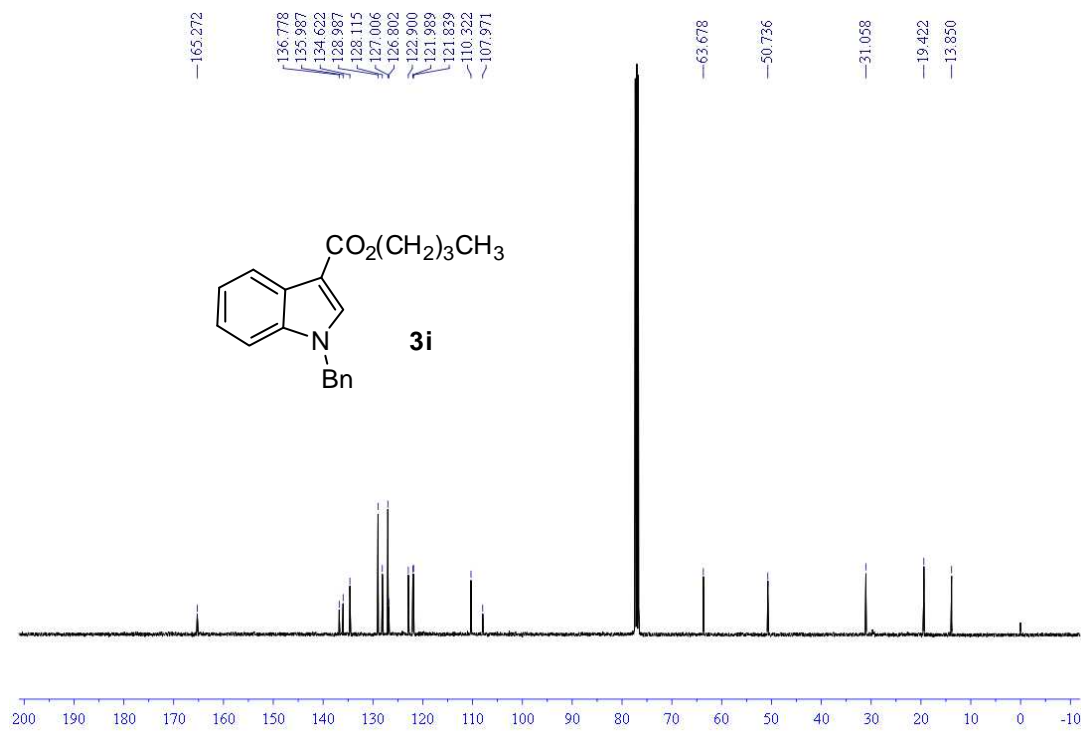

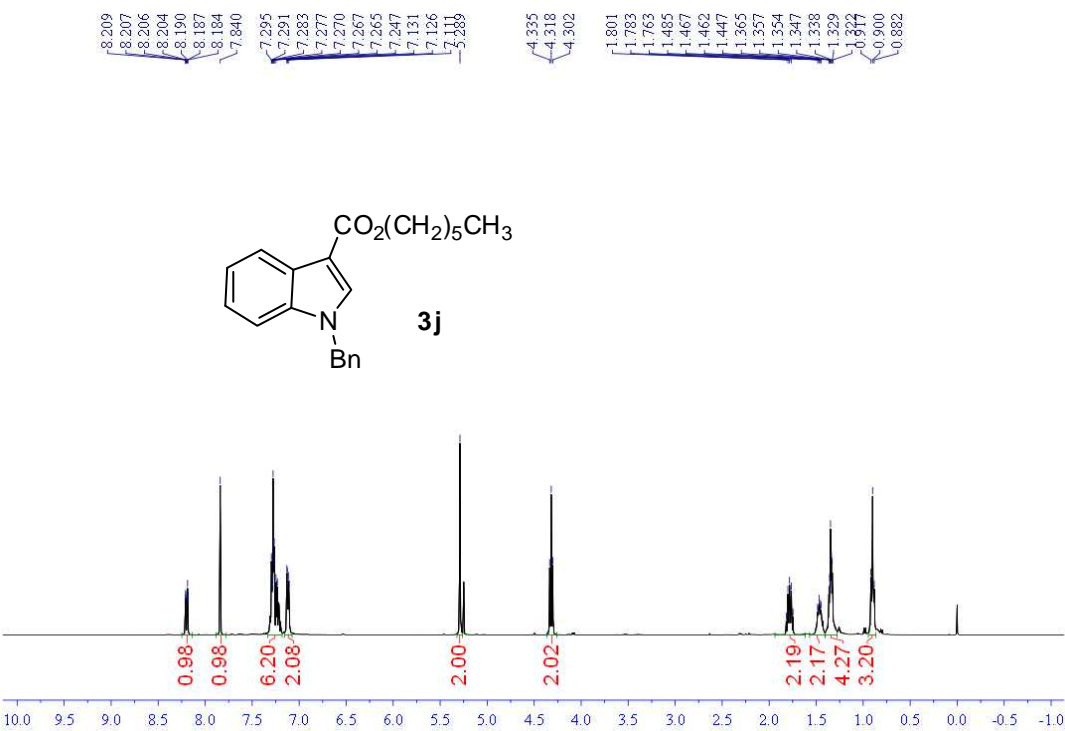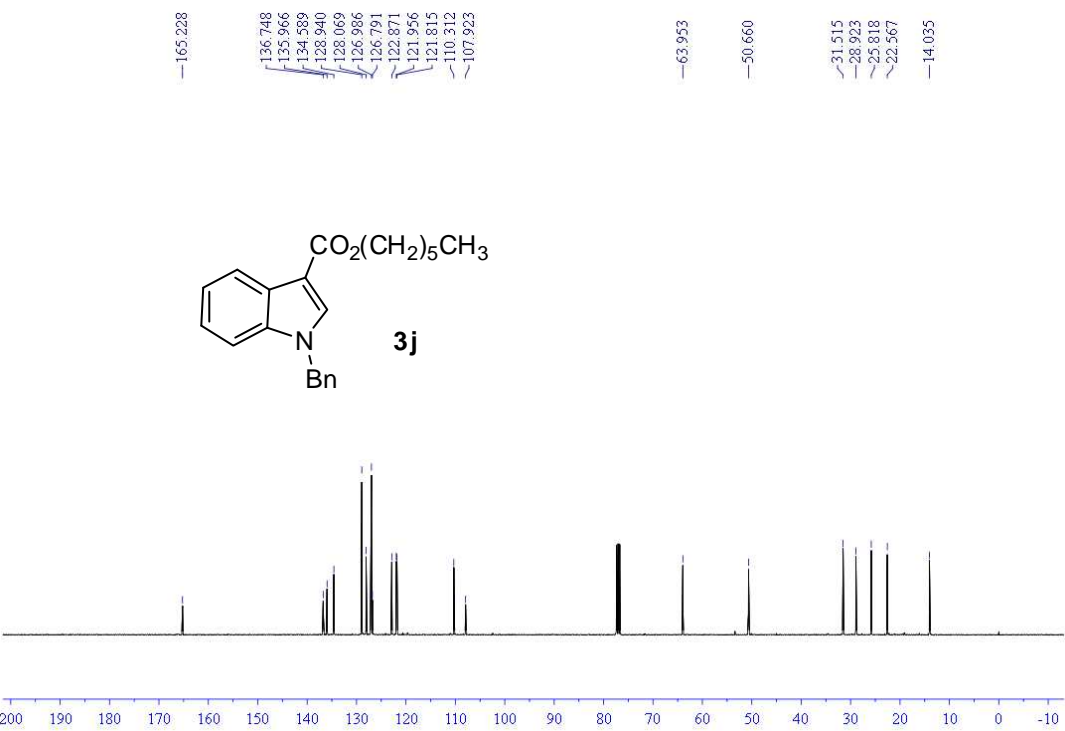

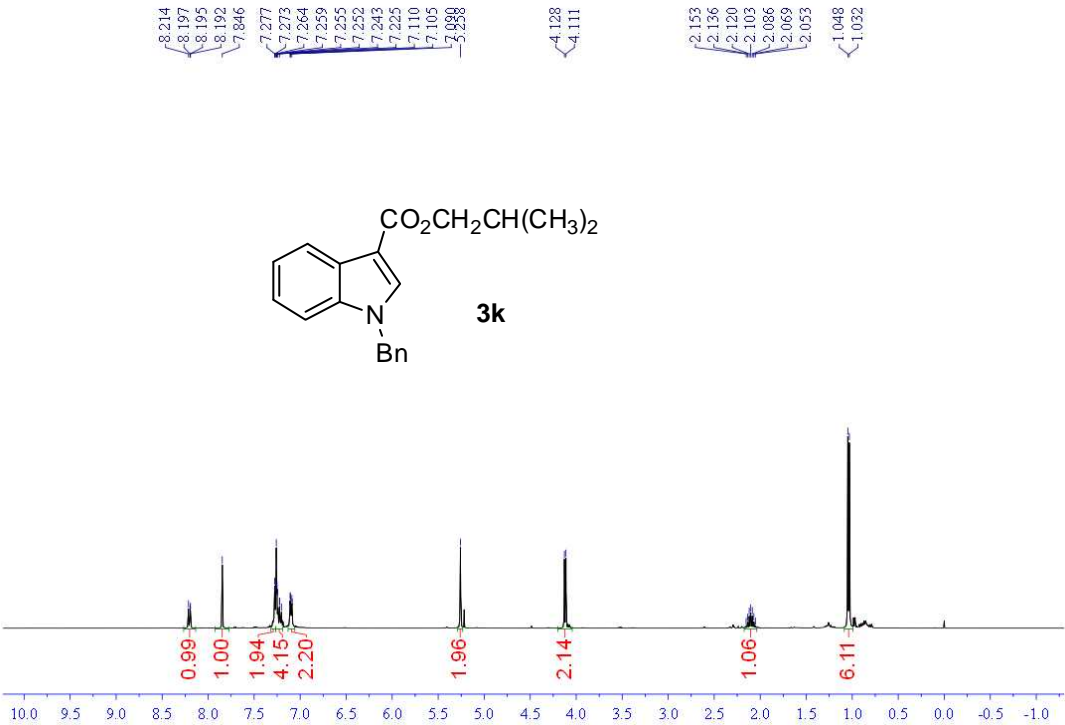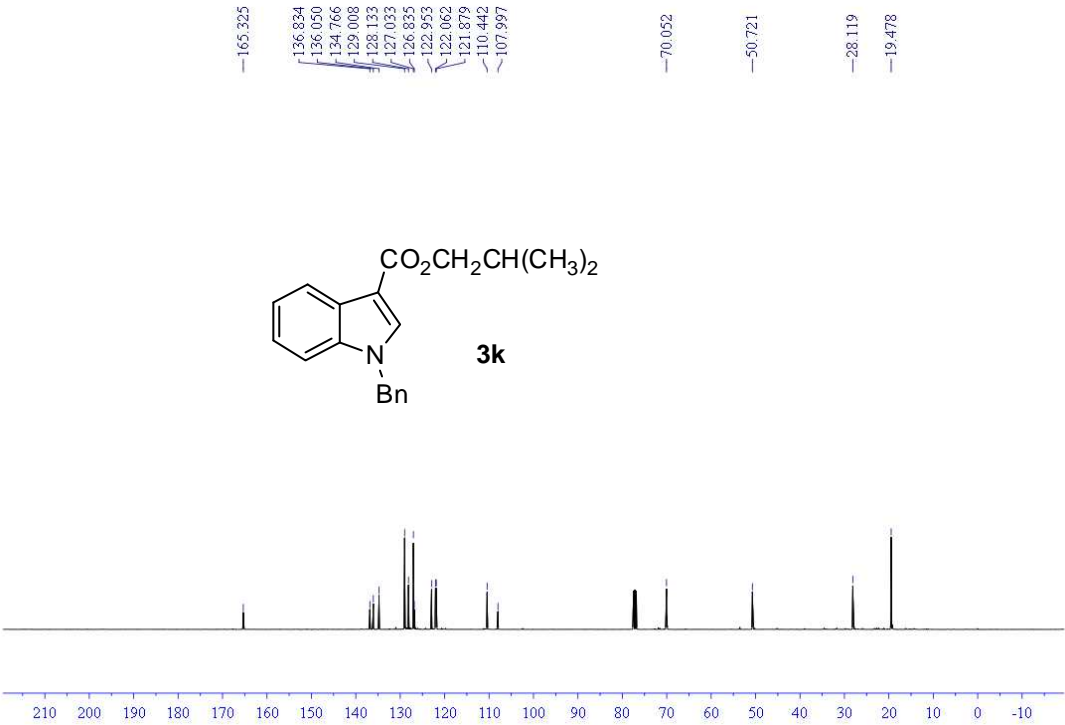

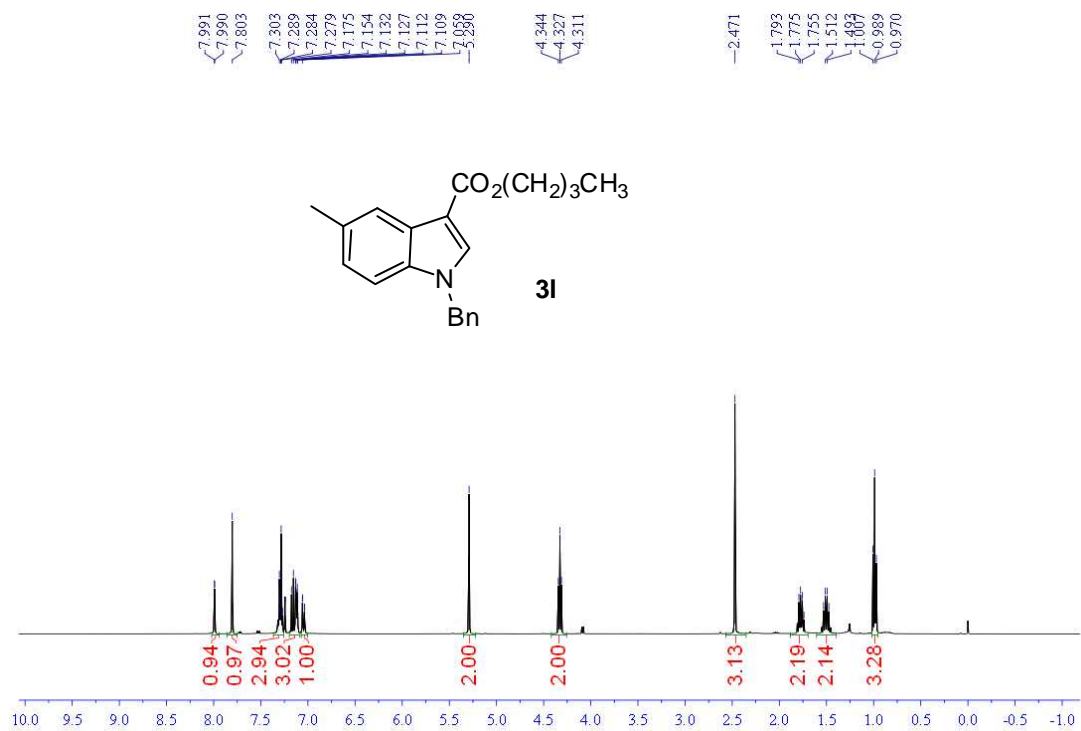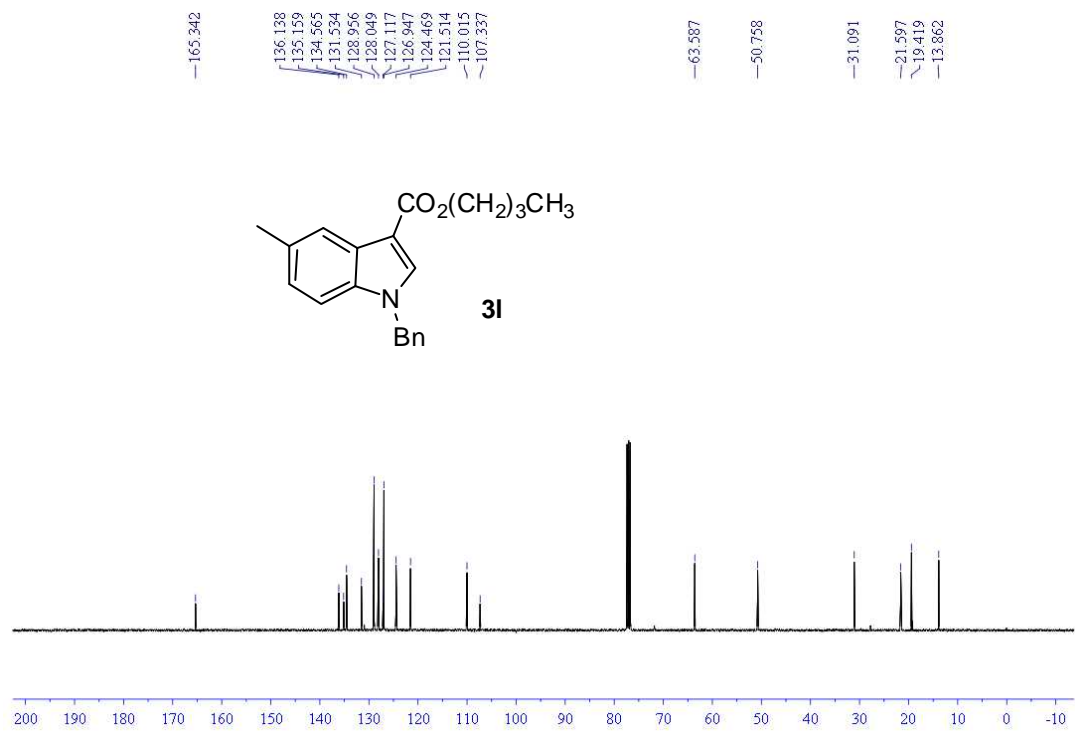



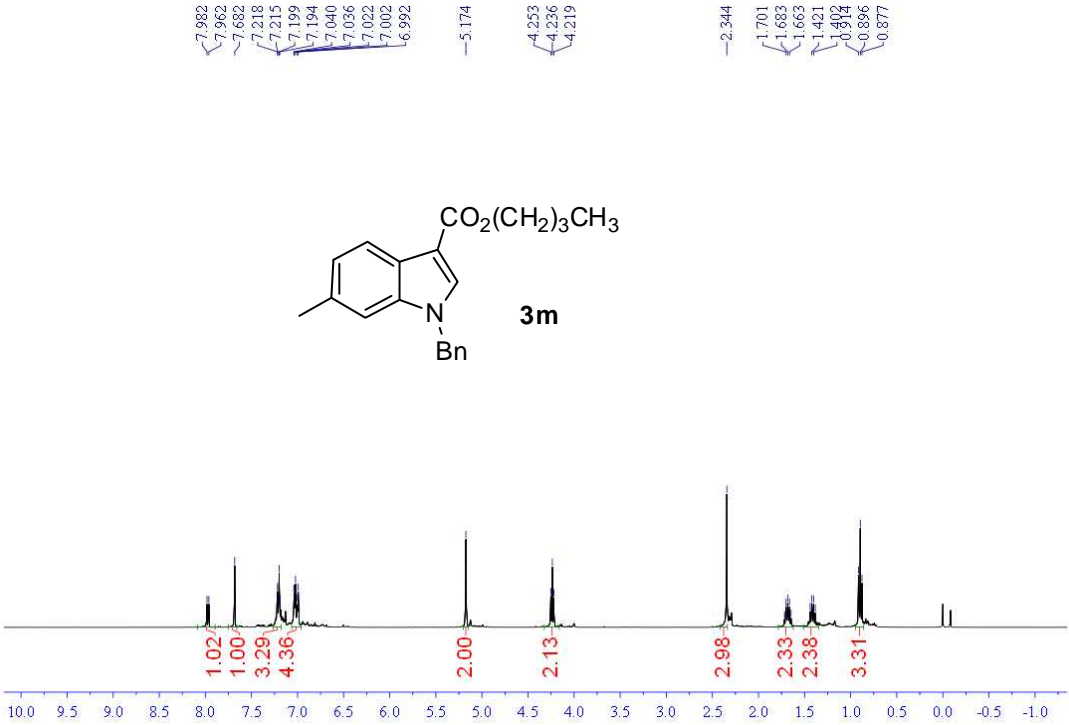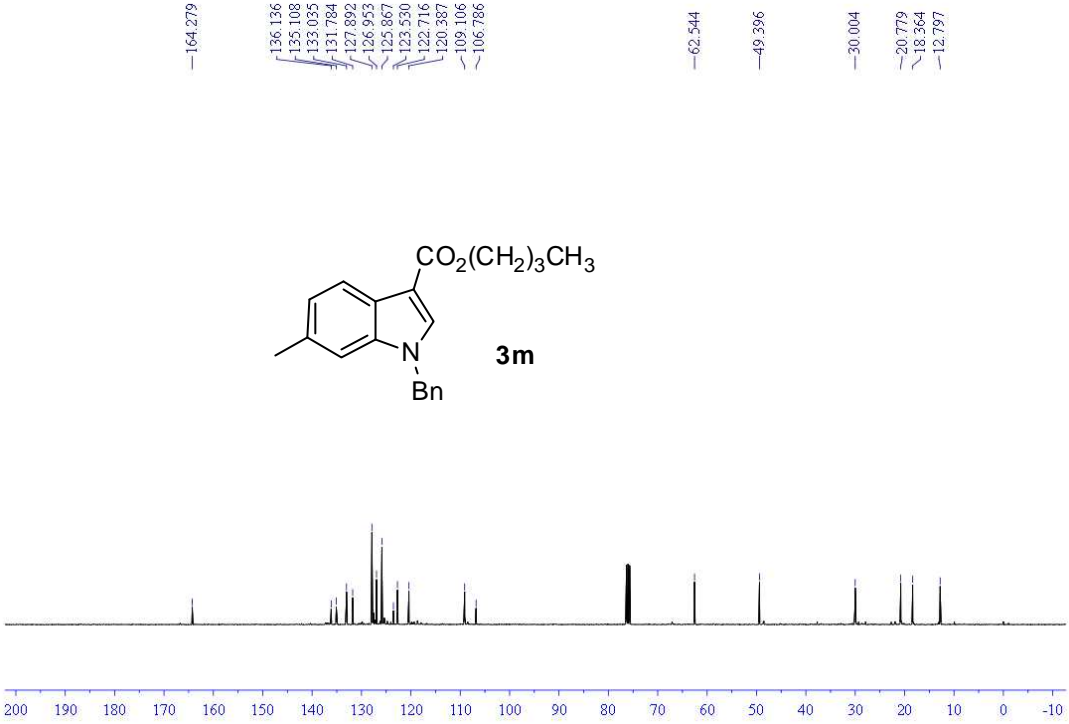

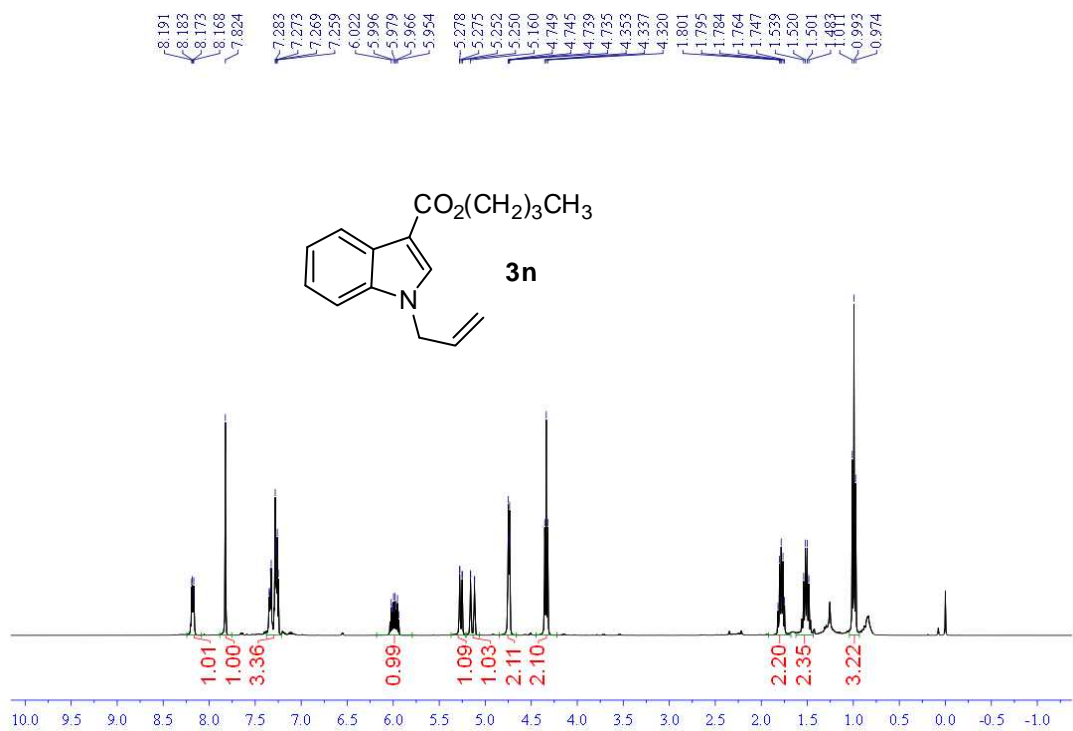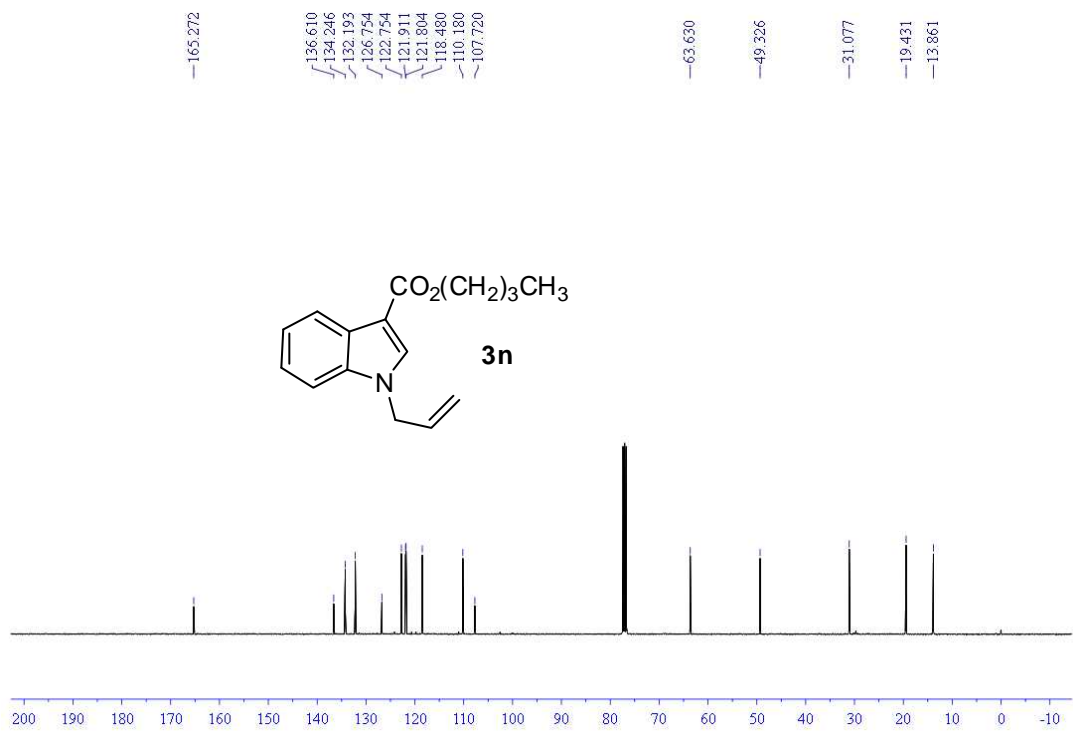

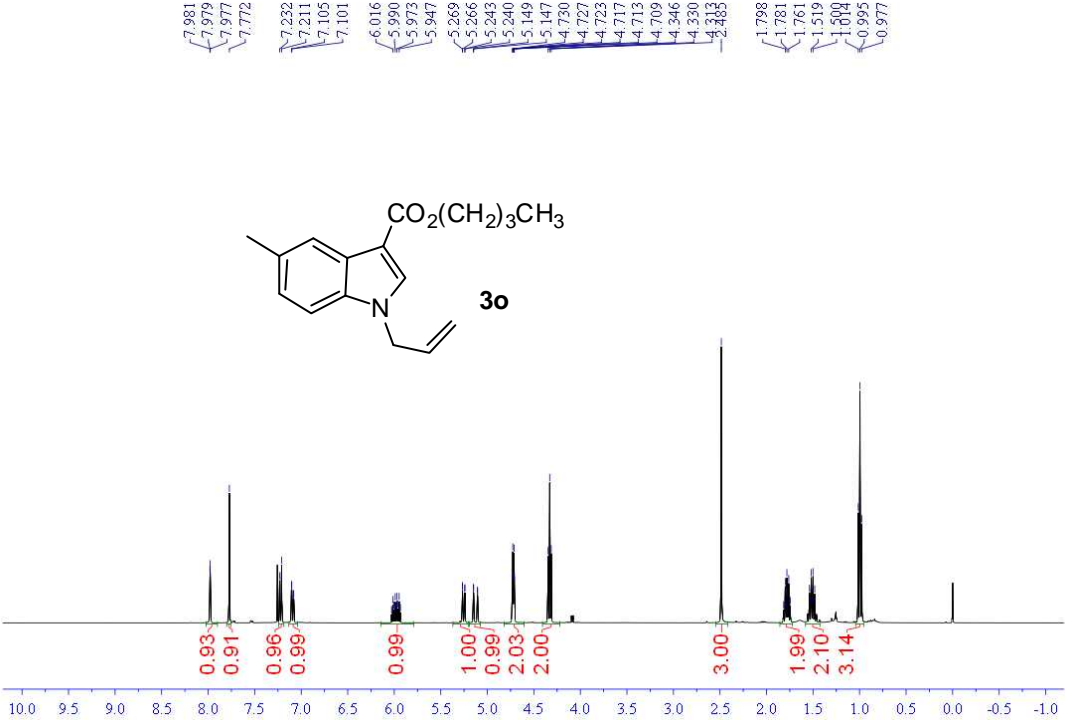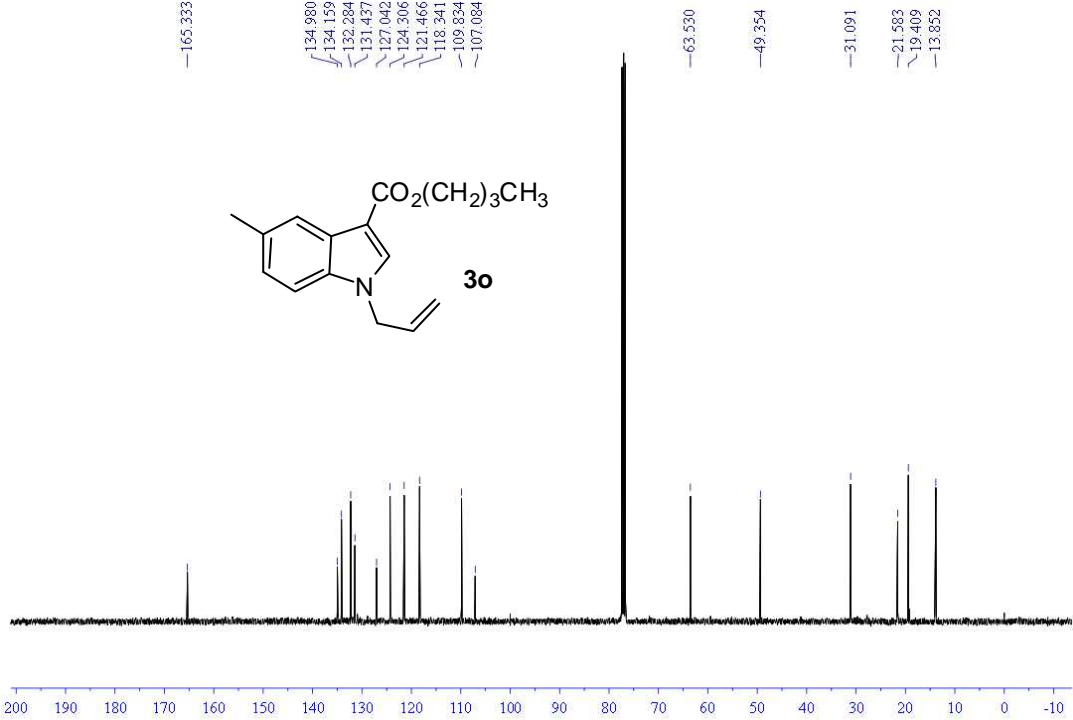

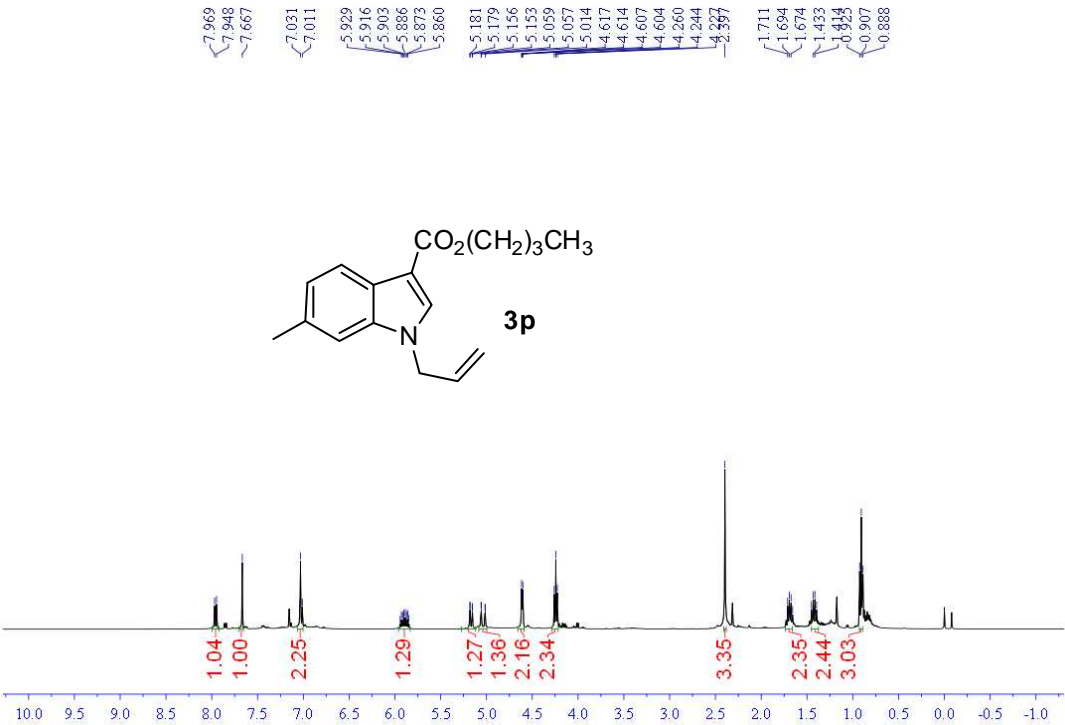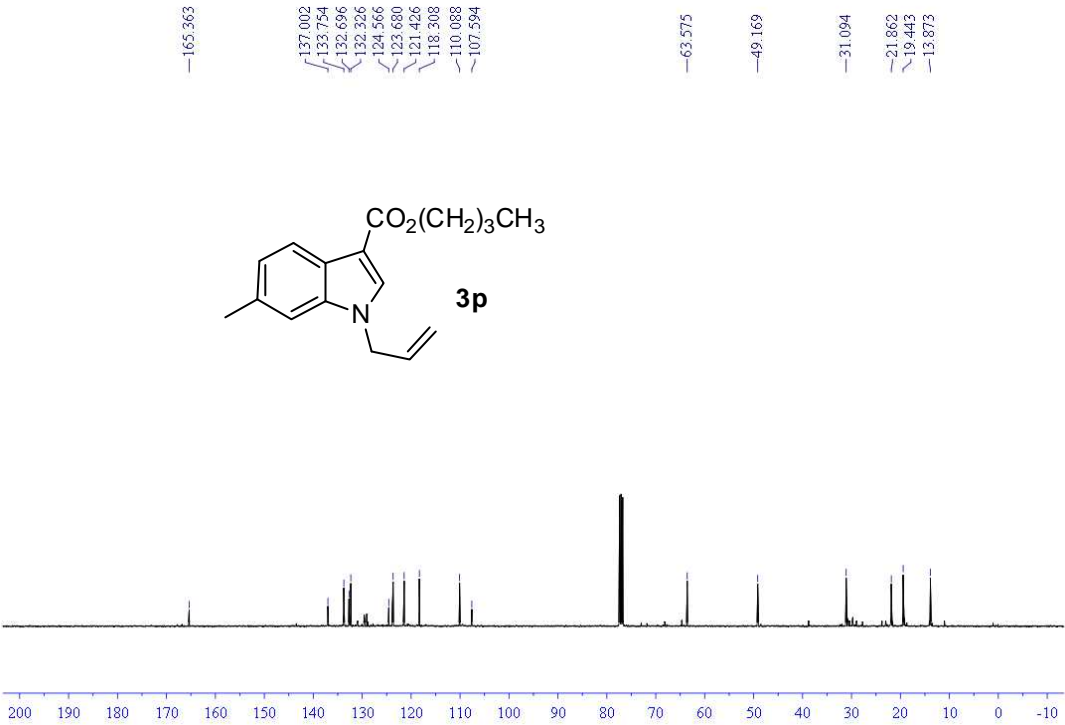

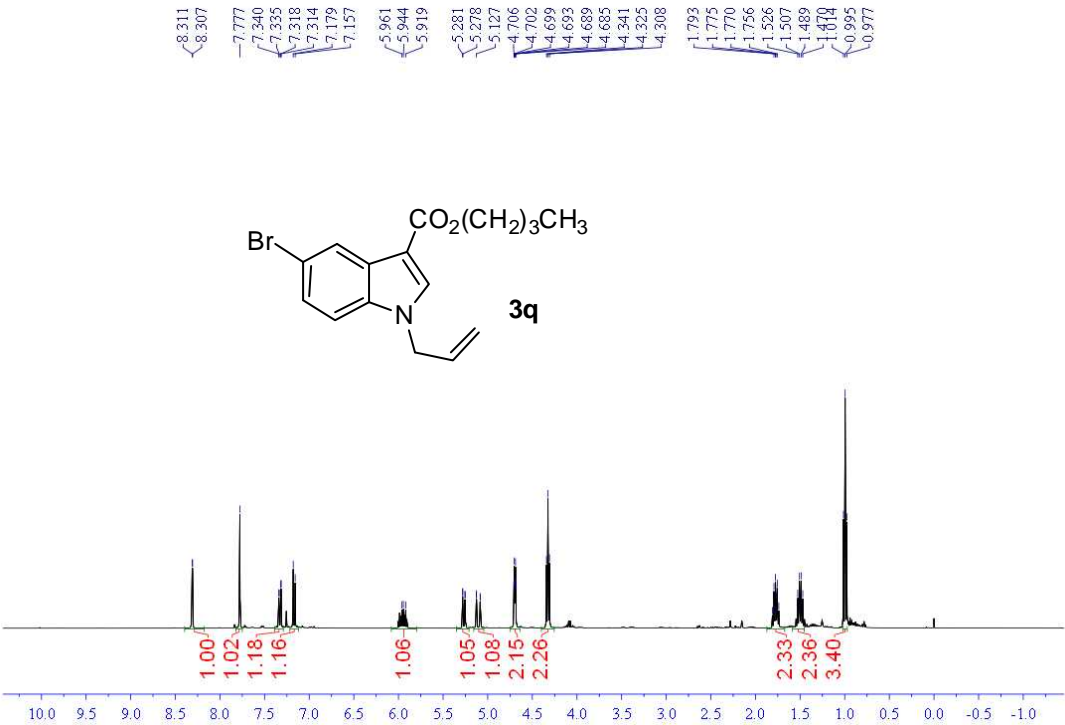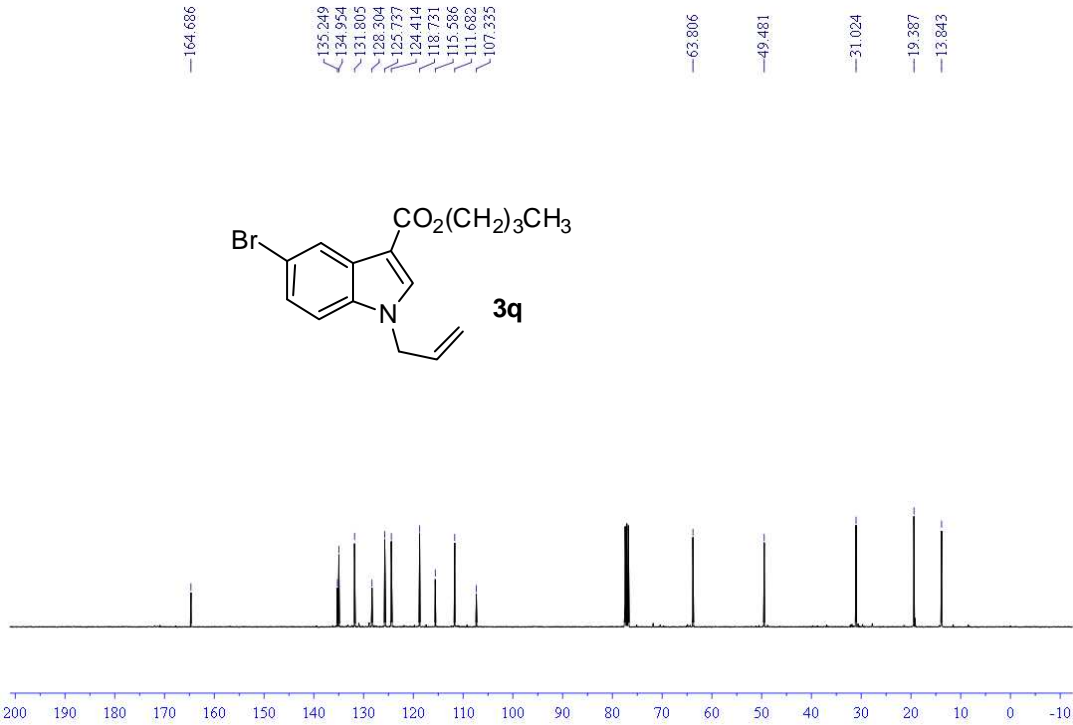

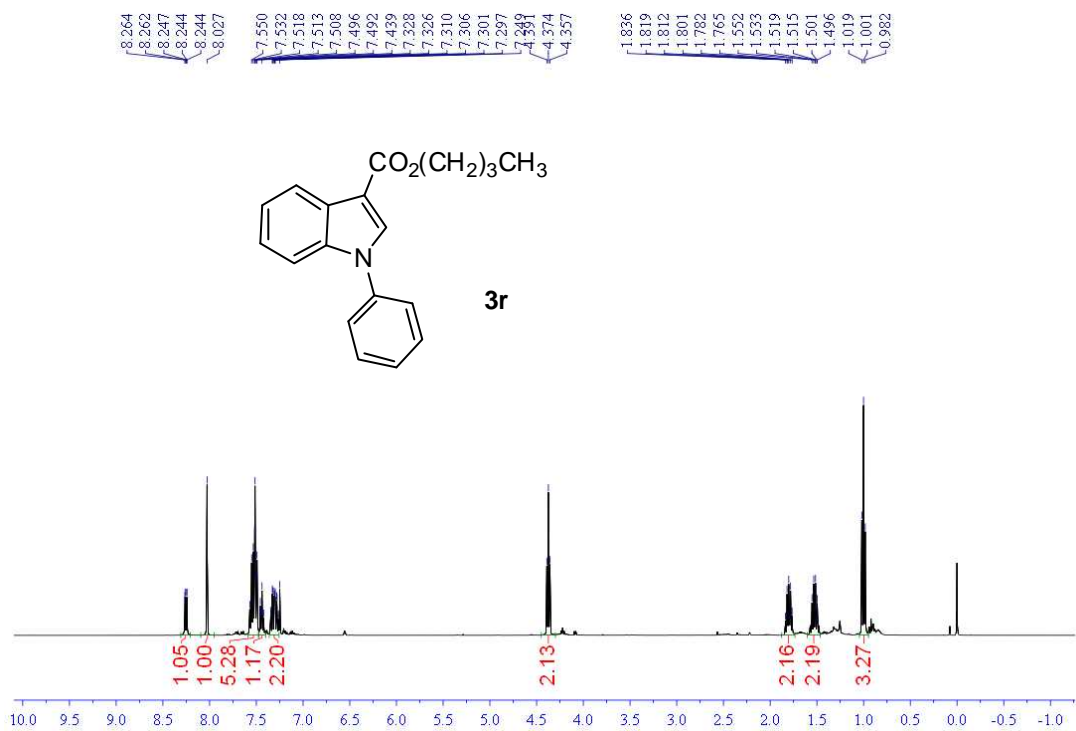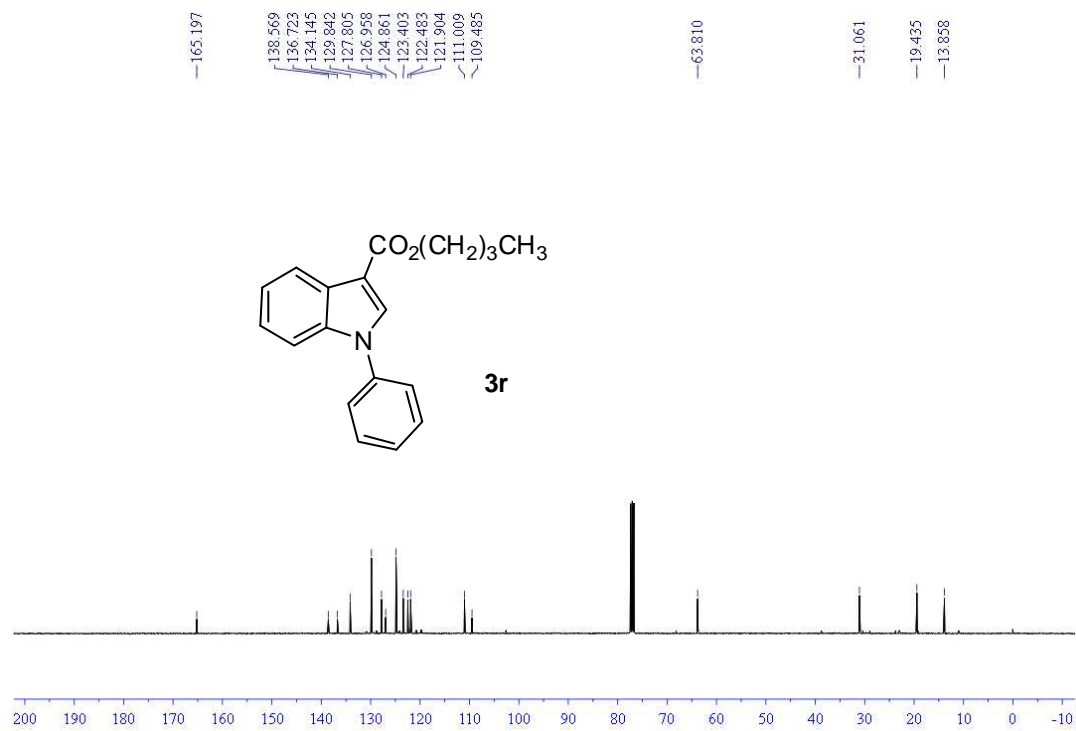

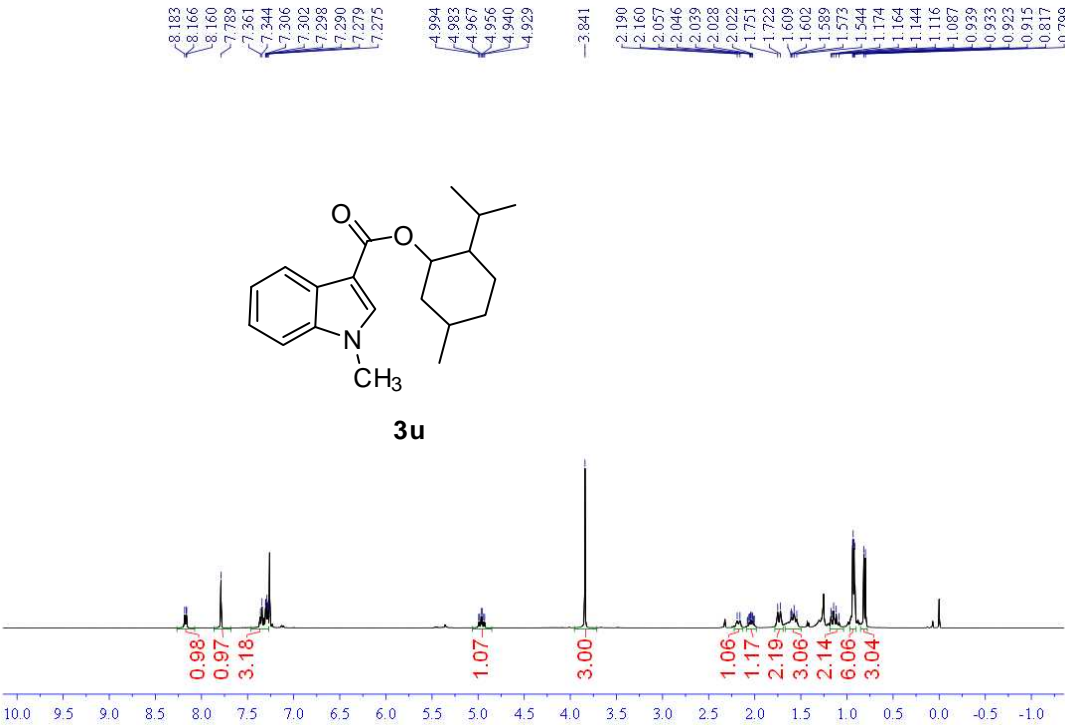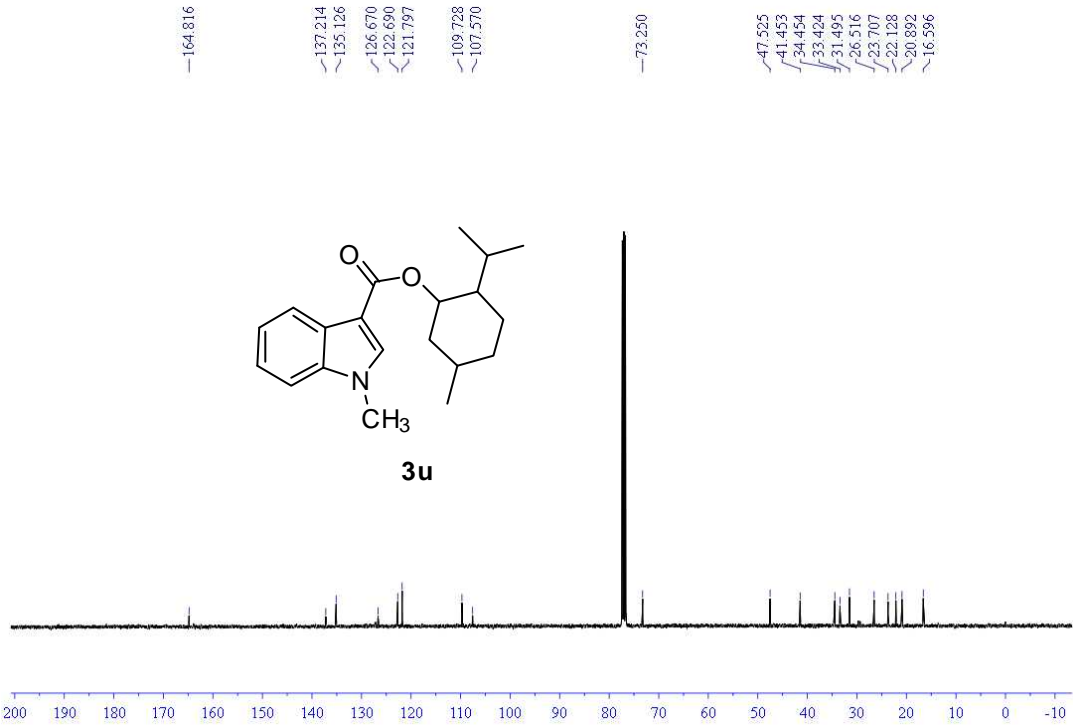

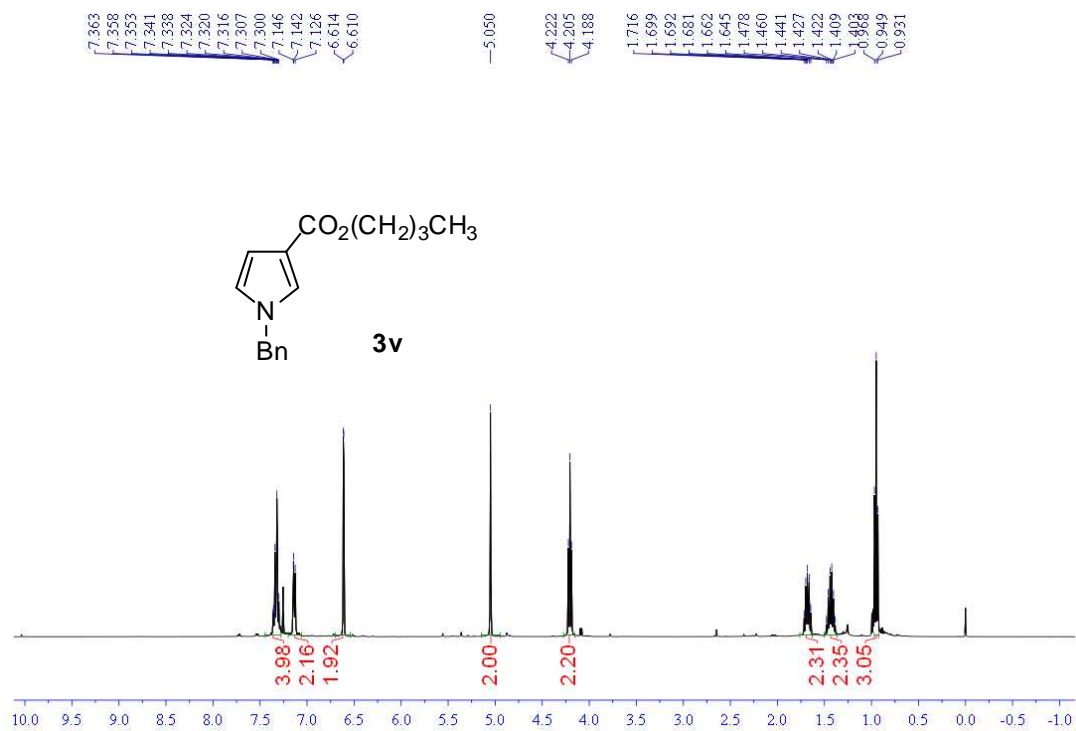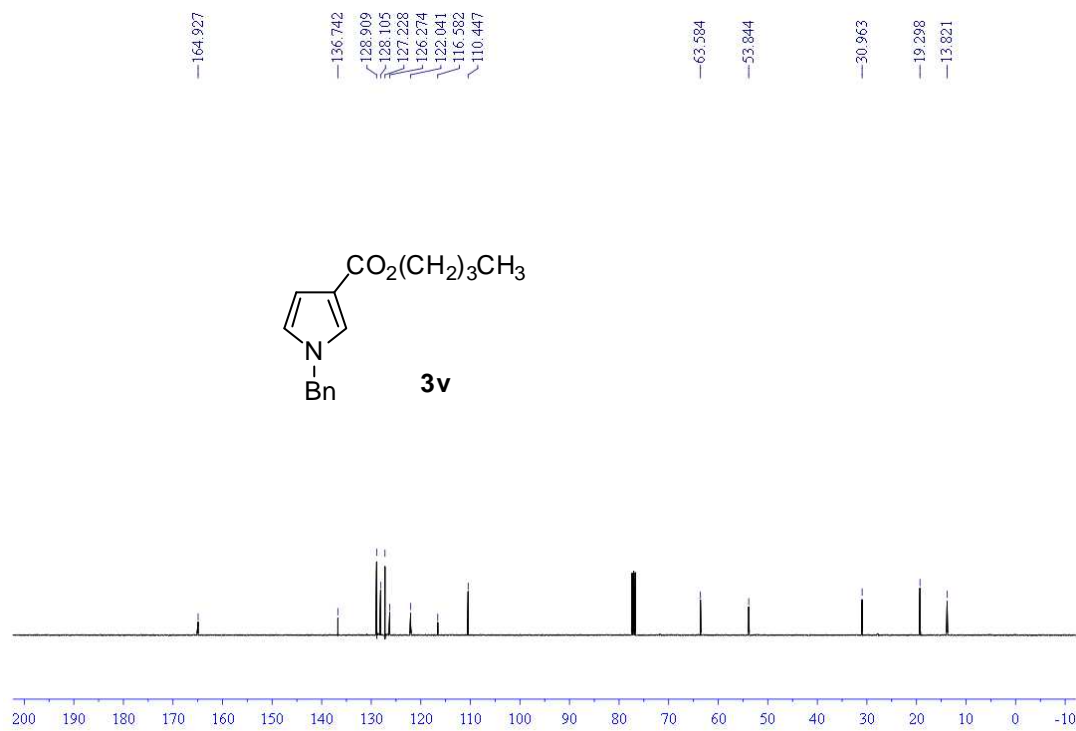



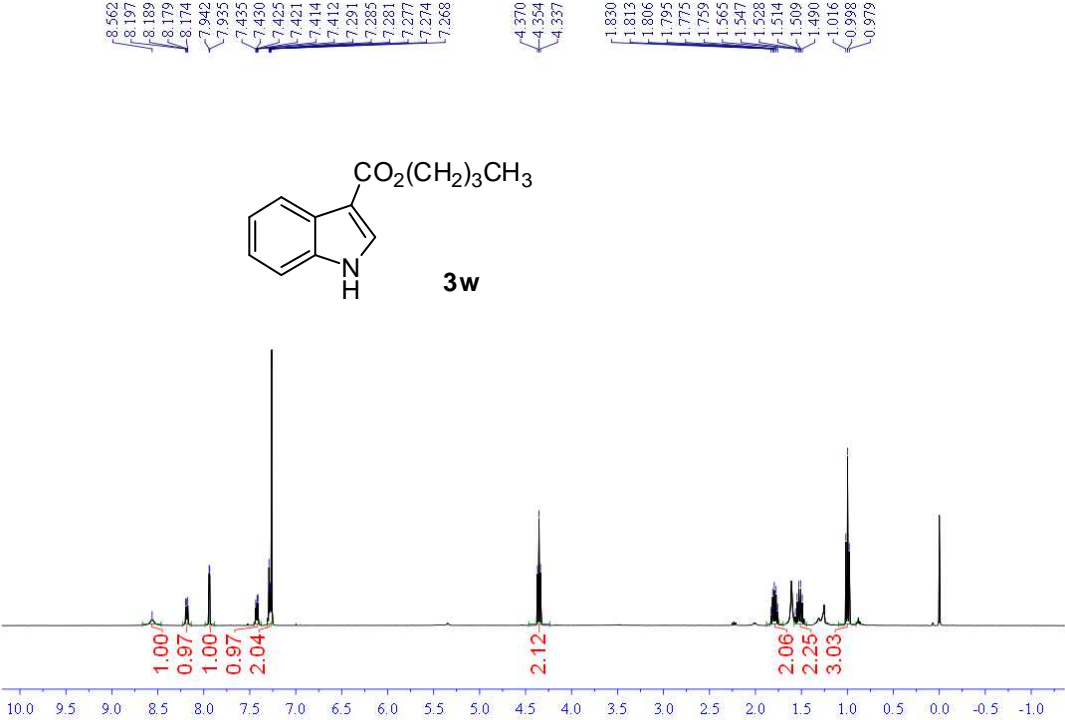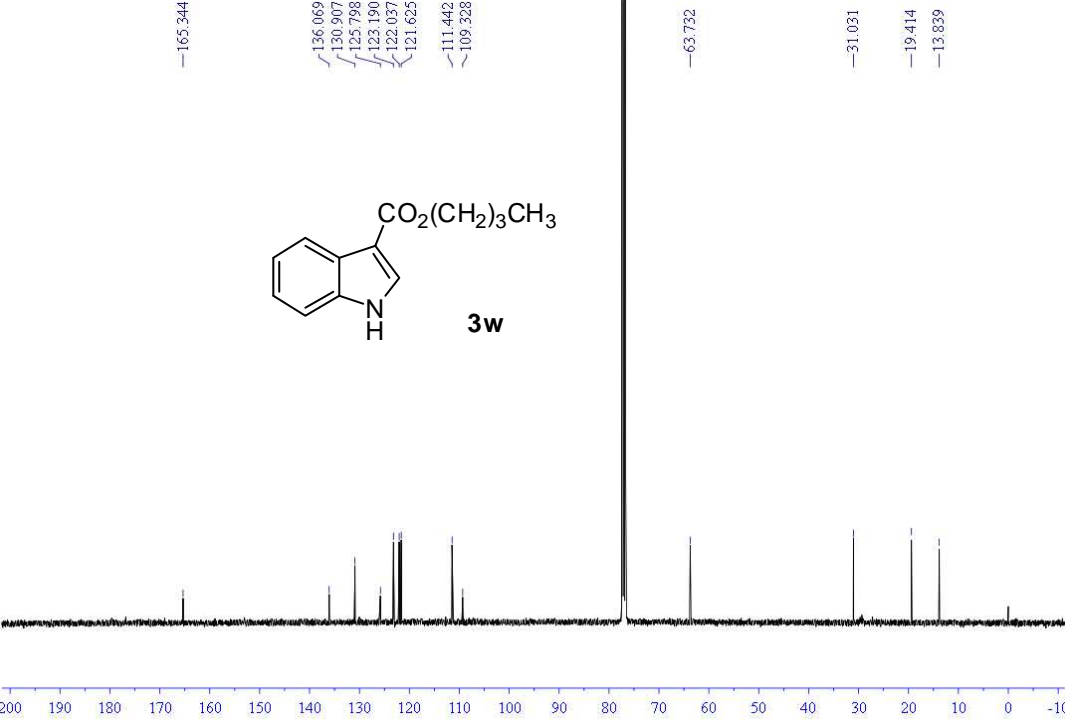

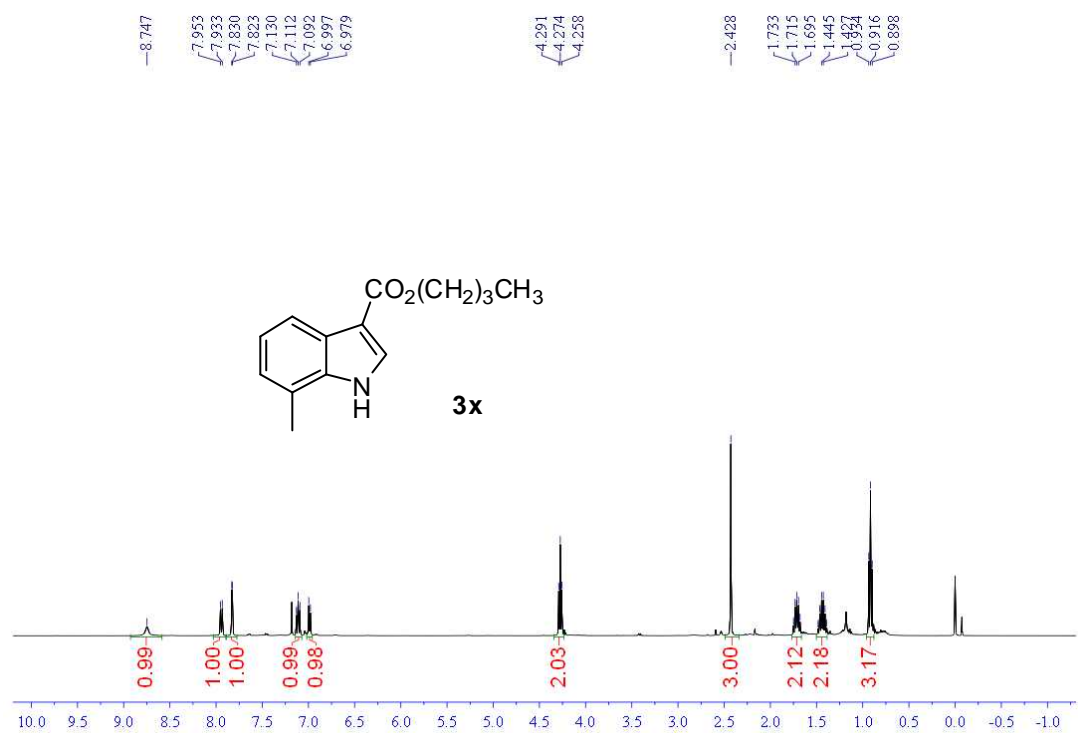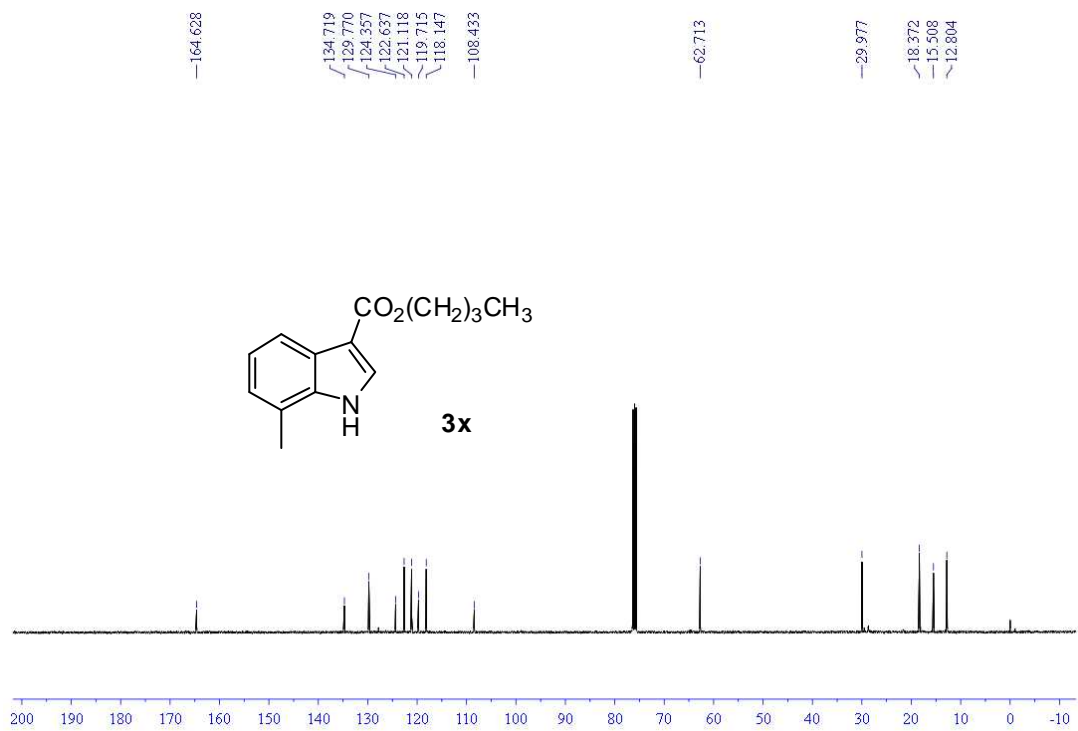

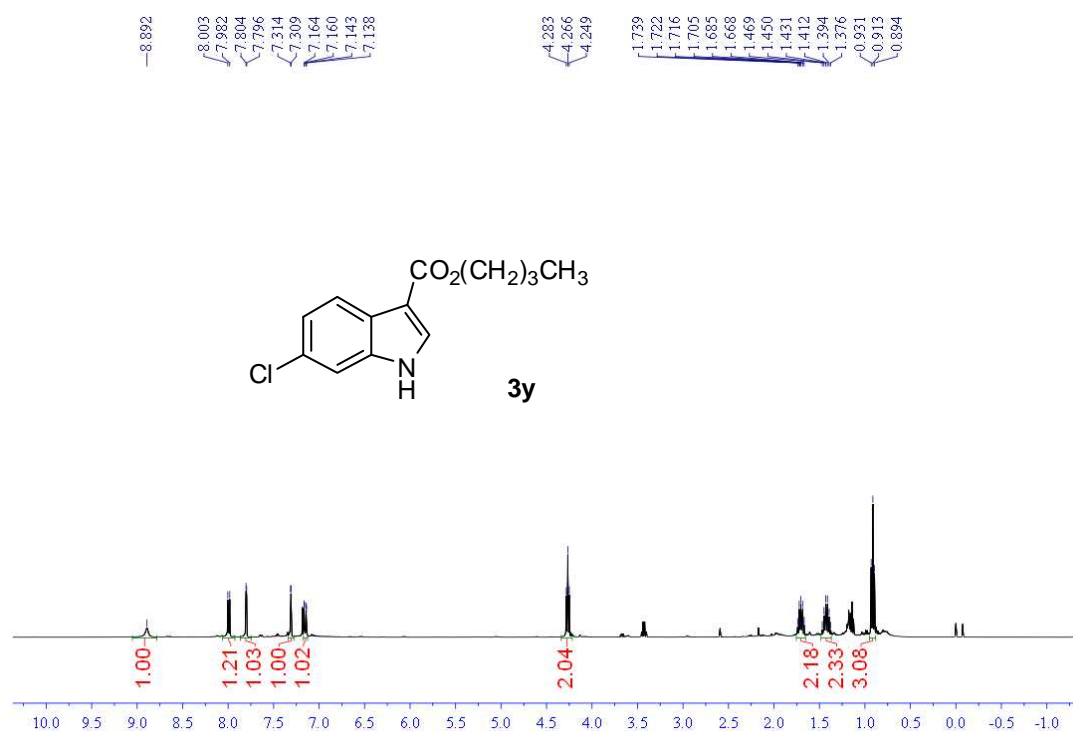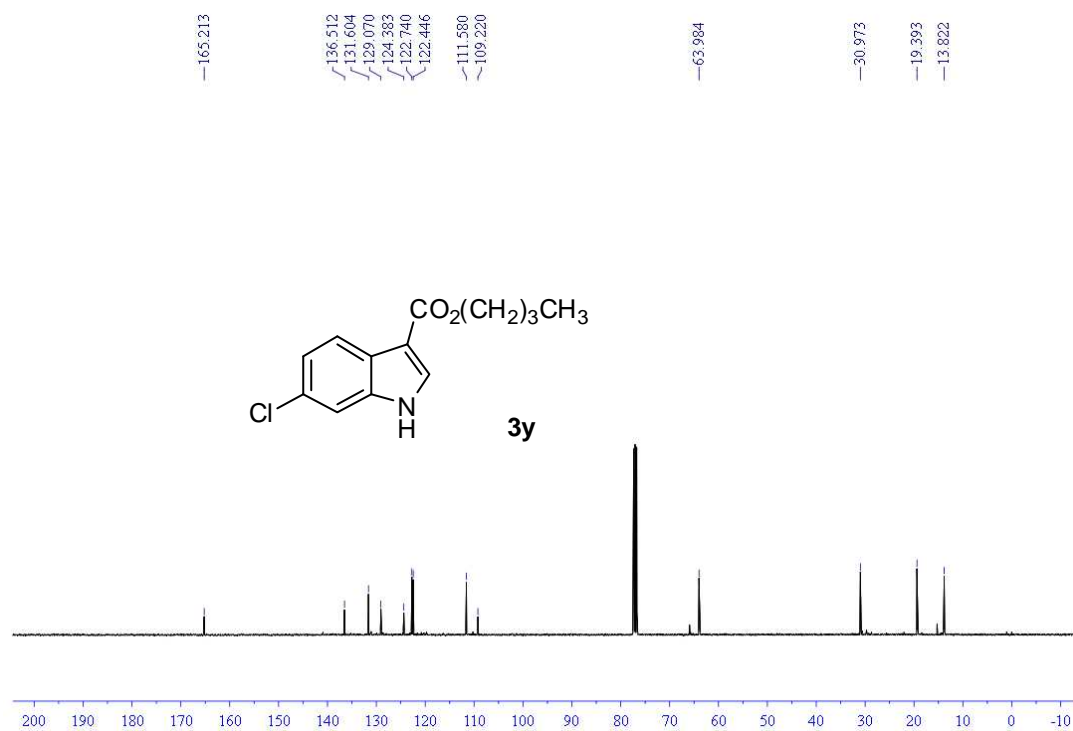

## 7. Heteronuclear multiple bond coherence (HMBC) spectrum of 3a

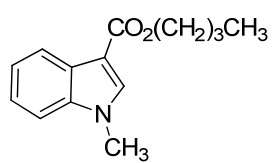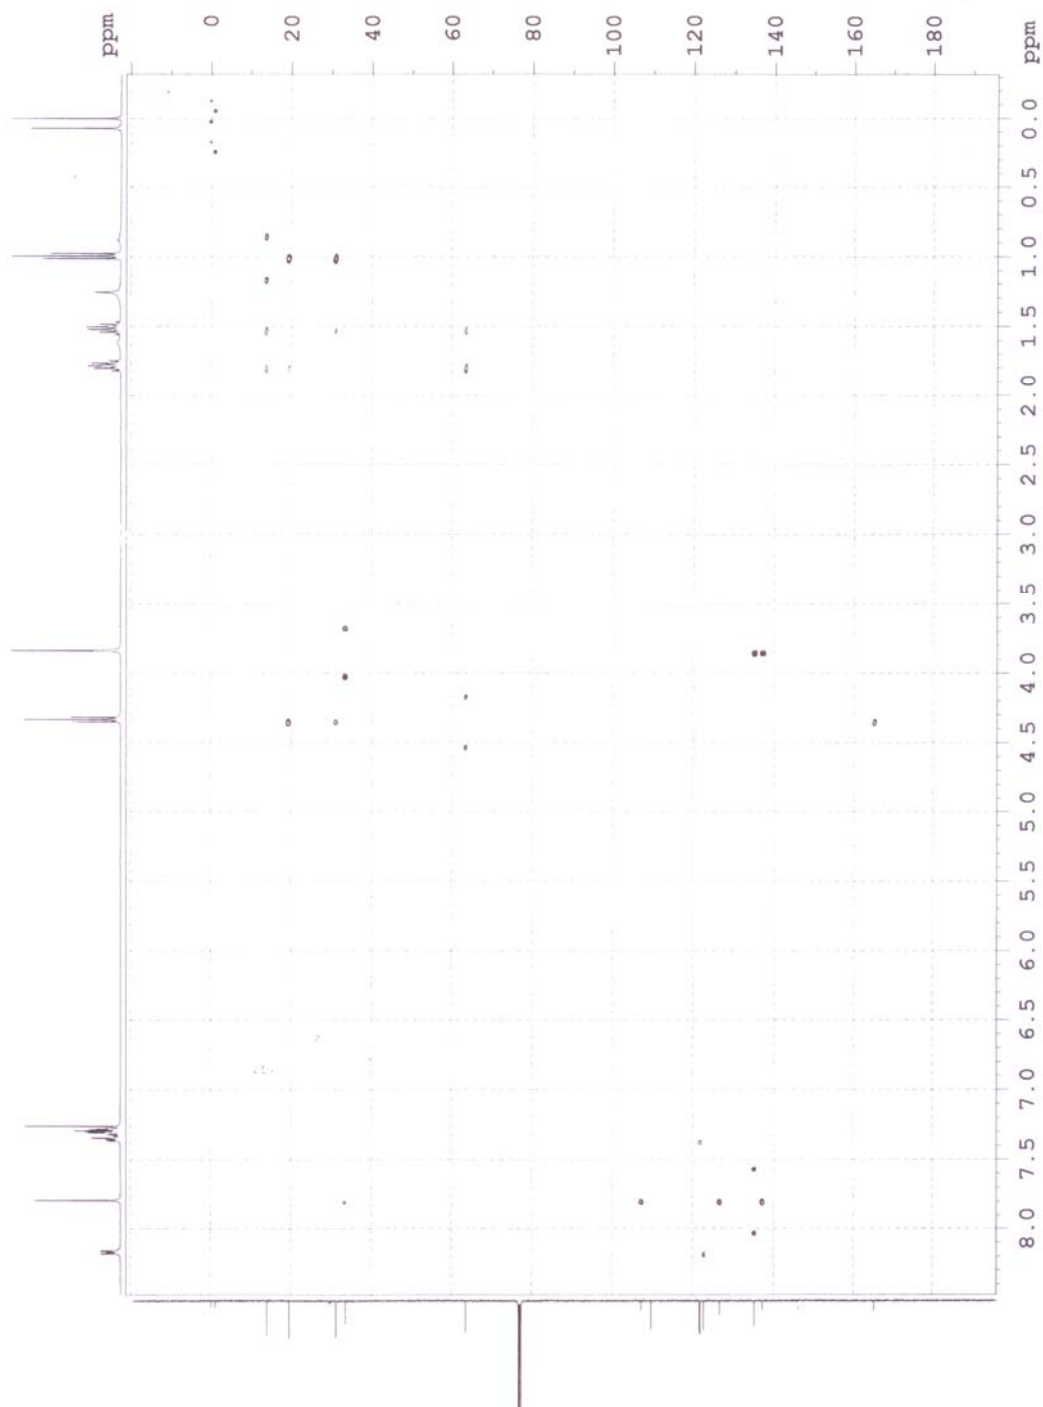

Supplement: c1cc15143f.pdf [file c1cc15143f.pdf]
